# Supplementary material for: Probing the catalytic activity of highly efficient sulfonic acid fabricated cobalt ferrite magnetic nanoparticles for the clean and scalable synthesis of dihydro, spiro and bis quinazolinones
Source: Royal Society of Chemistry journal article supplement (doi:10.1039/d1nj01149a), 2021-01-01
Supplement: d1nj01149a1.pdf [file d1nj01149a1.pdf]

# Probing Catalytic Activity of Highly Efficient Sulfonic Acid Fabricated Cobalt Ferrite Magnetic Nanoparticles for Clean and Scalable Synthesis of Dihydro, Spiro and bis Quinazolinones

Priyanka Yadav, Satish K. Awasthi\*

*Chemical Biology Laboratory, Department of Chemistry, University of Delhi, Delhi-110007, India*

## For table of contents only:

| S. No. | Contents                                                                                                          | Page No. |
|--------|-------------------------------------------------------------------------------------------------------------------|----------|
| 1.     | Materials and methods, characterization techniques                                                                | P1-P2    |
| 2.     | <b>Table S1</b> Crystal data and structure refinement for compound <b>3c</b>                                      | P2-P3    |
| 3.     | <b>Table S2</b> Crystal data and structure refinement for compound <b>5e</b>                                      | P3-P4    |
| 4.     | <b>Table S3</b> Calculation for green chemistry metrics for compound <b>3l</b> .                                  | P5-P6    |
| 5.     | <sup>1</sup> H and <sup>13</sup> C NMR chemical shifts for synthesized compounds ( <b>3a-3n, 5a-5f, 7 and 9</b> ) | P6-P10   |
| 6.     | <sup>1</sup> H and <sup>13</sup> C NMR spectra of synthesized compounds ( <b>3a-3n, 5a-5f, 7 and 9</b> )          | P11-P32  |
| 7.     | Mass spectra of some compounds                                                                                    | P33-P36  |
| 8.     | <b>Figure S1:</b> FT-IR spectra of reused catalyst                                                                | P37      |
| 9.     | <b>Figure S2:</b> Powder XRD analysis of reused catalyst                                                          | P37      |
| 10.    | <b>Figure S3:</b> XPS survey spectra of catalyst                                                                  | P38      |
| 11.    | <b>Figure S4:</b> Crystal structure of compound <b>5e</b> showing H-bonding                                       | P38      |
| 12.    | <b>Table S4</b> Calculation of TOF (h <sup>-1</sup> ) of the catalyst                                             | P39-P40  |

## Materials and Methods

Most of the chemicals and reagents used during the experiment were procured from Sigma-Aldrich, Fluka, Merck, Spectrochem, and all of them were of analytical grade and used as such without any further purification. All the reactions were monitored using Thin-layer chromatography (TLC), which were performed on Merck precoated silica gel aluminium plated (60F254) under UV light.

**Characterization Techniques.** The synthesized nanoparticles acting as nanocatalyst were characterized using aid of different techniques to assure their complete magnetization, functionalization. Bruker diffractometer (D8 Discover) was used to acquire X-ray diffraction (XRD) pattern at room temperature within 2θ range 5–80° (scanning rate = 2°/min, λ = 0.15406

nm, 40 kV, 40 mA). The TEM analysis of synthesized nanoparticles were carried out on FEI TECHNAI (model number G<sup>2</sup> T20) transmission electron microscope (operated at 200 kV). SEM studies were carried out using Carl Zeiss, India (Jeol Japan Mode: JSM 6610LV). N<sub>2</sub> adsorption-desorption isotherm and pore size distribution was measured by Micromeritics Instrument, Gemini Model: 2380. Magnetization measurements M (T, H) of nanoparticles were determined using vibrating sample magnetometer (model number EV-9, Microsense, ADE). The Fourier transform infrared spectra (FT-IR) of the nanoparticles were recorded using a PerkinElmer Spectrum 2000. <sup>1</sup>H NMR spectra of the synthesized compounds were recorded on 400 MHz JEOL NMR spectrometer in deuterated dimethylsulfoxide (DMSO) and chloroform (CDCl<sub>3</sub>). Chemical shifts (δ-values) have been reported in parts per million.

**Table S1:** Crystal data and structure refinement for compound **3c**.

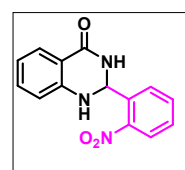

|                        |                                                                                                                   |
|------------------------|-------------------------------------------------------------------------------------------------------------------|
| CCDC Number            | 2033523                                                                                                           |
| Molecular Formula      | C <sub>14</sub> H <sub>11</sub> N <sub>3</sub> O <sub>3</sub>                                                     |
| Molecular weight       | 269.08                                                                                                            |
| Temperature            | 295.4                                                                                                             |
| Radiation              | Mo K $\alpha$ ( $\lambda$ = 0.71073)                                                                              |
| Crystal system         | Monoclinic                                                                                                        |
| Space group            | C2/c                                                                                                              |
| Unit cell dimensions   | a/Å 20.0038(9)<br>b/Å 10.8076(4)<br>c/Å 12.4320(5)<br>$\alpha$ /° 90<br>$\beta$ /° 109.8180(10)<br>$\gamma$ /° 90 |
| Volume /Å <sup>3</sup> | 2528.53(18)                                                                                                       |

|                                                 |                                                               |
|-------------------------------------------------|---------------------------------------------------------------|
| Z                                               | 50                                                            |
| Density ( $\rho_{\text{calc}}/\text{cm}^3$ )    | 1.409                                                         |
| Absorption coefficient ( $\mu/\text{mm}^{-1}$ ) | 0.102                                                         |
| F(000)                                          | 1112.6                                                        |
| 2 $\theta$ range for data collection            | 4.32 to 56.58                                                 |
| Index ranges                                    | $-26 \leq h \leq 26, -14 \leq k \leq 14, -16 \leq l \leq 16$  |
| Reflections collected                           | 20839                                                         |
| Independent reflections                         | 3136 [ $R_{\text{int}} = 0.0206, R_{\text{sigma}} = 0.0188$ ] |
| Data/restraints/parameters                      | 3136/0/182                                                    |
| Goodness-of-fit on $F^2$                        | 1.303                                                         |
| Final R indexes [ $I \geq 2\sigma(I)$ ]         | $R_1 = 0.0850, wR_2 = 0.2335$                                 |
| Final R indexes [all data]                      | $R_1 = 0.1382, wR_2 = 0.2821$                                 |
| Largest diff. peak/hole / $e \text{ \AA}^{-3}$  | 0.32/-0.80                                                    |

**Table S2:** Crystal data and structure refinement for compound **5e**.

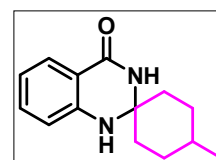

|                   |                                                  |
|-------------------|--------------------------------------------------|
| CCDC Number       | 2043509                                          |
| Molecular Formula | C <sub>14</sub> H <sub>18</sub> N <sub>2</sub> O |
| Molecular weight  | 230.30                                           |
| Temperature       | 293                                              |
| Radiation         | Mo K $\alpha$ ( $\lambda = 0.71073$ )            |
| Crystal system    | orthorhombic                                     |
| Space group       | P1                                               |

|                                                 |                                                                                                                                                   |
|-------------------------------------------------|---------------------------------------------------------------------------------------------------------------------------------------------------|
| Unit cell dimensions                            | $a/\text{\AA}$ 10.223(8)<br>$b/\text{\AA}$ 11.333(12)<br>$c/\text{\AA}$ 21.64(2)<br>$\alpha/^\circ$ 90<br>$\beta/^\circ$ 90<br>$\gamma/^\circ$ 90 |
| Volume / $\text{\AA}^3$                         | 2507(4)                                                                                                                                           |
| Z                                               | 50                                                                                                                                                |
| Density ( $\rho_{\text{calc}}/\text{cm}^3$ )    | 1.222                                                                                                                                             |
| Absorption coefficient ( $\mu/\text{mm}^{-1}$ ) | 0.078                                                                                                                                             |
| F(000)                                          | 994.4                                                                                                                                             |
| 2 $\theta$ range for data collection            | 4.4 to 56.58                                                                                                                                      |
| Index ranges                                    | $-10 \leq h \leq 11$ , $-14 \leq k \leq 15$ , $-28 \leq l \leq 17$                                                                                |
| Reflections collected                           | 12964                                                                                                                                             |
| Independent reflections                         | 12500 [ $R_{\text{int}} = 0.2383$ , $R_{\text{sigma}} = 0.1422$ ]                                                                                 |
| Data/restraints/parameters                      | 12500/3/1233                                                                                                                                      |
| Goodness-of-fit on $F^2$                        | 1.343                                                                                                                                             |
| Final R indexes [ $I \geq 2\sigma(I)$ ]         | $R_1 = 0.1484$ , $wR_2 = 0.3604$                                                                                                                  |
| Final R indexes [all data]                      | $R_1 = 0.2422$ , $wR_2 = 0.4592$                                                                                                                  |
| Largest diff. peak/hole / $e \text{\AA}^{-3}$   | 0.49/-0.65                                                                                                                                        |

**Table S3:** Calculation of green chemistry metrics for compound **31**.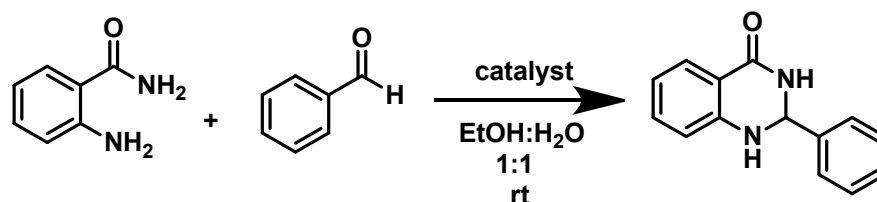

|               |        |        |        |
|---------------|--------|--------|--------|
| <b>F.W.</b>   | 136.06 | 106.04 | 224.09 |
| <b>mmol</b>   | 1.0    | 1.0    | 0.98   |
| <b>amount</b> | 0.136  | 0.106  | 0.220  |

| S. No. | Parameters                       | Formula                                                                                | Characteristics                                                                                                             | Ideal Value | Calculated value for compound 31                     |
|--------|----------------------------------|----------------------------------------------------------------------------------------|-----------------------------------------------------------------------------------------------------------------------------|-------------|------------------------------------------------------|
| 1.     | Environmental (E) factor         | [Total mass of raw materials - the total mass of product]/mass of product              | E-factor signifies the total amount of waste generated in a chemical reaction.                                              | 0           | $[(0.136 + 0.106) - 0.220] / 0.220 = 0.10$           |
| 2.     | Process mass intensity (PMI)     | $\sum$ (mass of stoichiometric reactants)/[mass of stoichiometric product]             | PMI takes into account reaction efficiency, stoichiometry, amount of solvent and all reagent used in the chemical reaction. | 1           | $(0.136 + 0.106) / 0.220 = 1.1$                      |
| 3.     | Reaction mass efficiency (RME %) | $[\text{mass of product} / \sum (\text{mass of stoichiometric reactants})] \times 100$ | RME accounts into atom economy, chemical yield and stoichiometry.                                                           | 100 %       | $[0.220 / (0.136 + 0.106)] \times 100 = 90.90\%$     |
| 4.     | Atom economy (AE %)              | $[\text{MW of product}] \div \sum (\text{MW of stoichiometric reactants}) \times 100$  | Atom economy signifies the percentage of atoms wasted in chemical                                                           | 100 %       | $[(224.09) / (136.06 + 106.04)] \times 100 = 92.6\%$ |

|    |                          |                                                                        |                                                                                                                                                                                     |       |                                                                                                    |
|----|--------------------------|------------------------------------------------------------------------|-------------------------------------------------------------------------------------------------------------------------------------------------------------------------------------|-------|----------------------------------------------------------------------------------------------------|
|    |                          | 100                                                                    | reaction.<br>Higher the value of AE, greener is the reaction.<br>Maximum value of atom economy is 100% which indicates that all the atoms present in reactants lies in the product. |       |                                                                                                    |
| 5. | Carbon efficiency (CE %) | [Amount of carbon in product/ Total carbon present in reactants] x 100 | CE signifies the percentage of carbons in the reactants that is left in the product.                                                                                                | 100 % | $[1 \times 14 / (1 \times 7 + 1 \times 7)] \times 100$<br>$= [14 / (7+7)] \times 100$<br>$= 100\%$ |

### **<sup>1</sup>H and <sup>13</sup>C NMR chemical shifts (3a-3n, 5a-5f, 7 and 9)**

#### **(3a)**

<sup>1</sup>H NMR (DMSO-d<sub>6</sub>, 400 MHz),  $\delta_{\text{H}}$  (ppm): 8.31 (s, 1H), 7.55 (d, J = 8.4 Hz, 3H), 7.40 (d, J = 8.4 Hz, 2H), 7.21 (t, 1H), 7.12 (s, 1H), 6.70 (d, J = 8.1 Hz, 1H), 6.64 (t, 1H), 5.71 (s, 1H)

<sup>13</sup>C NMR (DMSO-d<sub>6</sub>, 101 MHz),  $\delta_{\text{C}}$  (ppm): 164.01, 148.15, 141.61, 133.94, 131.77, 129.62, 127.89, 122.10, 117.81, 115.45, 114.98, 66.30.

#### **(3b)**

<sup>1</sup>H NMR (CDCl<sub>3</sub> + DMSO-d<sub>6</sub>, 400 MHz),  $\delta_{\text{H}}$  (ppm): 7.92 (d, J = 7.7 Hz, 1H), 7.53 (d, J = 8.2 Hz, 2H), 7.41 (d, J = 8.1 Hz, 2H), 7.34 (t, 1H), 6.90 (t, 1H), 6.67 (d, J = 8.0 Hz, 1H), 6.29 (s, 1H), 5.89 (s, 1H), 4.37 (s, 1H).

<sup>13</sup>C NMR (DMSO-d<sub>6</sub>, 101 MHz),  $\delta_{\text{C}}$  (ppm): 164.00, 148.17, 141.20, 133.92, 133.48, 129.28, 128.83, 127.89, 117.80, 115.46, 114.98, 66.26.

#### **(3c)**

<sup>1</sup>H NMR (DMSO-d<sub>6</sub>, 400 MHz),  $\delta_{\text{H}}$  (ppm): 8.19 (s, 1H), 8.03 (d, J = 8.1 Hz, 1H), 7.82 (d, J = 7.8 Hz, 1H), 7.75 (t, 1H), 7.60 (q, J = 7.8 Hz, 2H), 7.20-7.24 (m, 1H), 6.97 (s, 1H), 6.66-6.74 (m, 2H), 6.30 (s, 1H).

$^{13}\text{C}$  NMR (DMSO- $d_6$ , 101 MHz),  $\delta_c$  (ppm): 163.90, 148.17, 147.65, 136.42, 134.45, 134.09, 130.43, 129.46, 127.84, 125.25, 118.21, 117.09, 115.43, 115.03, 62.68.

**(3d)**

$^1\text{H}$  NMR (DMSO- $d_6$ , 400 MHz),  $\delta_H$  (ppm): 8.50 (s, 1H), 8.22 (d,  $J = 8.7$  Hz, 2H), 7.71 (d,  $J = 8.5$  Hz, 2H), 7.57 (d,  $J = 7.8$  Hz, 1H), 7.31 (s, 1H), 7.20-7.24 (m, 1H), 6.73 (d,  $J = 8.1$  Hz, 1H), 6.65 (t, 1H), 5.88 (s, 1H)

$^{13}\text{C}$  NMR (DMSO- $d_6$ , 101 MHz),  $\delta_c$  (ppm): 163.82, 149.86, 147.92, 147.77, 134.10, 128.56, 127.93, 124.12, 117.99, 115.41, 115.07, 65.77

**(3e)**

$^1\text{H}$  NMR ( $\text{CDCl}_3 + \text{DMSO-}d_6$ , 400 MHz),  $\delta_H$  (ppm): 8.24 (s, 1H), 7.66 (m, 3H), 7.49 (d,  $J = 8.2$  Hz, 1H), 7.26 (t, 1H), 7.04 (s, 1H), 6.70-6.77 (m, 2H), 6.12 (s, 1H)

$^{13}\text{C}$  NMR (DMSO- $d_6$ , 101 MHz),  $\delta_c$  (ppm): 169.54, 152.25, 141.46, 139.78, 138.70, 137.98, 134.57, 134.17, 132.72, 132.39, 123.20, 119.70, 68.67.

**(3f)**

$^1\text{H}$  NMR (DMSO- $d_6$ , 400 MHz),  $\delta_H$  (ppm): 8.22 (s, 1H), 7.61 (d,  $J = 9.0$  Hz, 1H), 7.37 (d,  $J = 8.0$  Hz, 2H), 7.18-7.26 (m, 3H), 7.05 (s, 1H), 6.74 (d,  $J = 8.0$  Hz, 1H), 6.67 (t, 1H), 5.71 (s, 1H), 2.30 (s, 3H).

$^{13}\text{C}$  NMR (DMSO- $d_6$ , 101 MHz),  $\delta_c$  (ppm): 164.07, 148.35, 139.13, 138.15, 133.69, 129.25, 127.78, 127.24, 117.50, 115.46, 114.86, 66.82, 21.19

**(3g)**

$^1\text{H}$  NMR (DMSO- $d_6$ , 400 MHz),  $\delta_H$  (ppm): 8.34 (s, 1H), 7.90 (d,  $J = 8.2$  Hz, 2H), 7.54-7.57 (m, 3H), 7.18-7.22 (m, 2H), 6.70 (d,  $J = 8.2$  Hz, 1H), 6.63 (t, 1H), 5.78 (s, 1H), 3.44 (brs, 1H).

$^{13}\text{C}$  NMR (DMSO- $d_6$ , 101 MHz),  $\delta_c$  (ppm): 167.54, 163.96, 148.22, 146.72, 133.96, 129.92, 127.90, 127.28, 117.80, 115.42, 114.98, 66.50.

**(3h)**

$^1\text{H}$  NMR (DMSO- $d_6$ , 400 MHz),  $\delta_H$  (ppm): 8.36 (s, 1H), 7.91 (s, 1H), 7.86-7.89 (m, 3H), 7.67 (d,  $J = 8.7$ , 1H), 7.61 (d,  $J = 7.8$ , 1H), 7.48 (m, 2H), 7.19-7.23 (t, 1H), 6.74 (d,  $J = 7.8$  Hz, 1H), 6.64 (t, 1H), 5.90 (s, 1H), 3.86 (brs, 1H)

$^{13}\text{C}$  NMR (DMSO- $d_6$ , 101 MHz),  $\delta_c$  (ppm): 164.22, 148.40, 139.39, 133.97, 133.44, 132.98, 128.67, 128.50, 128.11, 127.95, 126.94, 126.35, 125.34, 117.74, 115.43, 114.82, 67.26.

**(3i)**

$^1\text{H}$  NMR (DMSO- $d_6$ , 400 MHz),  $\delta_{\text{H}}$  (ppm): 8.43 (s, 1H), 7.59 (d,  $J = 7.7$  Hz, 1H), 7.41 (d,  $J = 4.9$  Hz, 1H), 7.23 (t, 1H), 7.10 (d,  $J = 8.3$  Hz, 1H), 6.94 (m, 1H), 6.74 (d,  $J = 8.1$  Hz, 1H), 6.67 (t, 1H), 5.99 (s, 1H).

$^{13}\text{C}$  NMR (DMSO- $d_6$ , 101 MHz),  $\delta_{\text{C}}$  (ppm): 163.68, 147.78, 146.98, 133.91, 127.85, 127.00, 126.41, 126.23, 118.06, 115.64, 115.25, 63.10.

**(3j)**

$^1\text{H}$  NMR (DMSO- $d_6$ , 400 MHz),  $\delta_{\text{H}}$  (ppm):  $\delta$  8.10 (d,  $J = 7.7$  Hz, 1H), 8.04 (s, 1H), 7.79 (d,  $J = 7.6$  Hz, 2H), 7.51-7.59 (m, 2H), 7.04-7.10 (m, 2H), 6.35 (s, 1H), 6.13 (s, 1H), 5.12 (s, 1H)

$^{13}\text{C}$  NMR ( $\text{CDCl}_3$  + DMSO- $d_6$ , 101 MHz),  $\delta_{\text{C}}$  (ppm):  $\delta$  169.60, 152.35, 147.49, 138.70, 137.05, 135.22, 132.89, 130.86, 127.34, 123.39, 119.85, 119.59, 72.34.

**(3k)**

$^1\text{H}$  NMR ( $\text{CDCl}_3$ , 400 MHz),  $\delta_{\text{H}}$  (ppm):  $\delta$  7.93 (dd,  $J = 7.8$ , 1H), 7.30-7.35 (m, 1H), 7.19 (s, 1H), 7.03 (dd,  $J = 8.2$ , 2.0 Hz, 1H), 6.85-6.91 (m, 2H), 6.66 (d,  $J = 8.0$  Hz, 1H), 5.83 (s, 1H), 5.79 (s, 1H), 4.37 (s, 1H), 3.90 (s, 6H)

$^{13}\text{C}$  NMR ( $\text{CDCl}_3$ , 101 MHz),  $\delta_{\text{C}}$  (ppm):  $\delta$  164.93, 150.51, 149.66, 147.40, 134.11, 130.93, 128.80, 120.25, 119.77, 115.70, 114.64, 111.10, 109.82, 69.11, 56.10

**(3l)**

$^1\text{H}$  NMR (DMSO- $d_6$ , 400 MHz),  $\delta_{\text{H}}$  (ppm):  $\delta$  8.27 (s, 1H), 7.59 (d,  $J = 7.7$  Hz, 1H), 7.47 (d,  $J = 6.9$  Hz, 2H), 7.31-7.37 (m, 3H), 7.19-7.23 (m, 1H), 6.73 (d,  $J = 8.1$  Hz, 1H), 6.64 (t, 1H), 5.73 (s, 1H)

$^{13}\text{C}$  NMR (DMSO- $d_6$ , 101 MHz),  $\delta_{\text{C}}$  (ppm):  $\delta$  164.15, 148.41, 142.16, 133.85, 128.98, 128.86, 127.89, 127.40, 117.65, 115.49, 114.94, 67.10.

**(3m)**

$^1\text{H}$  NMR (DMSO- $d_6$ , 400 MHz),  $\delta_{\text{H}}$  (ppm):  $\delta$  8.28 (s, 1H), 7.61 (d,  $J = 7.8$  Hz, 1H), 7.52 (dd,  $J = 8.5$ , 5.5 Hz, 2H), 7.23 (dt,  $J = 20.2$ , 8.7 Hz, 2H), 6.67-6.76 (m, 2H), 5.77 (d,  $J = 1.8$  Hz, 1H)

$^{13}\text{C}$  NMR (DMSO- $d_6$ , 101 MHz),  $\delta_{\text{C}}$  (ppm):  $\delta$  164.18, 163.76, 148.14, 135.21, 133.98, 127.84, 117.83, 115.46, 115.25, 114.93, 66.27.



**(3n)**

$^1\text{H}$  NMR (DMSO- $d_6$ , 400 MHz),  $\delta_{\text{H}}$  (ppm): 8.77 (d,  $J = 9.3$  Hz, 1H), 8.38 (s, 1H), 8.29 (s, 4H), 8.23 (d,  $J = 9.3$  Hz, 1H), 8.19 (d,  $J = 2.9$  Hz, 1H), 8.09 (s, 1H), 7.72 (d,  $J = 7.7$  Hz, 1H), 7.25-7.29 (m, 1H), 7.19 (s, 1H), 6.83 (s, 1H), 6.74-6.78 (m, 2H)

$^{13}\text{C}$  NMR (DMSO- $d_6$ , 101 MHz),  $\delta_{\text{C}}$  (ppm):  $\delta$  164.66, 149.21, 133.88, 133.57, 131.76, 131.28, 130.69, 128.96, 128.36, 128.13, 128.04, 127.88, 126.94, 126.69, 126.09, 125.97, 125.28, 124.73, 124.44, 124.16, 117.96, 115.71, 115.12, 66.08.

**(5a)**

$^1\text{H}$  NMR (DMSO- $d_6$ , 400 MHz),  $\delta_{\text{H}}$  (ppm):  $\delta$  7.94 (s, 1H), 7.50 (d,  $J = 7.7$  Hz, 1H), 7.15 (t, 1H), 6.69 (d,  $J = 8.0$  Hz, 1H), 6.60 (s, 1H), 6.55 (t, 1H), 1.78-1.89 (m, 4H), 1.46 (s, 10H)

$^{13}\text{C}$  NMR (DMSO- $d_6$ , 101 MHz),  $\delta_{\text{C}}$  (ppm):  $\delta$  163.54, 147.38, 133.66, 127.58, 116.78, 114.89, 114.79, 71.87, 36.09, 28.21, 24.61, 21.27

**(5b)**

$^1\text{H}$  NMR ( $\text{CDCl}_3$ , 400 MHz),  $\delta_{\text{H}}$  (ppm):  $\delta$  7.84 (d,  $J = 7.7$ , 1H), 7.26 (t, 1H), 6.79 (t, 1H), 6.63 (d,  $J = 8.0$  Hz, 1H), 6.48 (s, 1H), 4.38 (s, 1H), 1.81 (s, 4H), 1.50-1.66 (m, 4H), 1.45 (dd,  $J = 11.2, 5.4$  Hz, 2H)

$^{13}\text{C}$  NMR ( $\text{CDCl}_3$ , 101 MHz),  $\delta_{\text{C}}$  (ppm):  $\delta$  164.33, 145.71, 133.97, 128.46, 118.82, 115.32, 114.88, 68.48, 37.88, 24.76, 22.01.

**(5c)**

$^1\text{H}$  NMR ( $\text{CDCl}_3$ , 400 MHz),  $\delta_{\text{H}}$  (ppm):  $\delta$  7.84 (d,  $J = 7.7$ , 1H), 7.23-7.27 (m, 1H), 6.77 (t, 2n), 6.61 (d,  $J = 8.1$  Hz, 1H), 4.44 (s, 1H), 2.00 (m, 4H), 1.48-1.60 (m, 8H)

$^{13}\text{C}$  NMR ( $\text{CDCl}_3$ , 101 MHz),  $\delta_{\text{C}}$  (ppm):  $\delta$  164.20, 145.76, 133.88, 128.35, 118.67, 115.30, 114.89, 72.57, 41.58, 29.09, 21.63.

**(5d)**

$^1\text{H}$  NMR (DMSO- $d_6$ , 400 MHz),  $\delta_{\text{H}}$  (ppm):  $\delta$  8.08 (s, 1H), 7.58 (d,  $J = 9.0$  Hz, 1H), 7.19-7.23 (m, 1H), 6.70 (d,  $J = 8.0$  Hz, 1H), 6.63 (t, 1H), 1.79 (s, 4H), 1.67 (s, 4H)

$^{13}\text{C}$  NMR (DMSO- $d_6$ , 101 MHz),  $\delta_{\text{C}}$  (ppm):  $\delta$  163.90, 147.97, 133.45, 127.70, 117.00, 115.05, 114.81, 77.66, 22.46

**(5e)**

$^1\text{H}$  NMR (DMSO- $d_6$ , 400 MHz),  $\delta_{\text{H}}$  (ppm):  $\delta$  7.83 (s, 1H), 7.52 (d,  $J = 7.7$  Hz, 1H), 7.16 (t, 1H), 6.83 (d,  $J = 8.1$  Hz, 1H), 6.51-6.64 (m, 2H), 1.87 (d,  $J = 10.3$  Hz, 2H), 1.27-1.44 (m, 7H), 0.85 (s, 3H)

$^{13}\text{C}$  NMR (DMSO- $d_6$ , 101 MHz),  $\delta_{\text{C}}$  (ppm):  $\delta$  163.85, 147.12, 127.54, 116.99, 115.20, 115.02, 114.83, 114.74, 68.12, 37.05, 31.48, 29.84, 29.20, 22.19

**(5f)**

$^1\text{H}$  NMR (DMSO- $d_6$ , 400 MHz),  $\delta_{\text{H}}$  (ppm):  $\delta$  8.11-8.17 (m, 1H), 7.68-7.79 (m, 1H), 7.54 (dd,  $J = 7.8, 1.8$  Hz, 1H), 7.19-7.24 (m, 1H), 6.78 (q, 1H), 6.62 (t, 1H), 3.96 (t, 2H), 3.75-3.85 (m, 2H), 1.80 (dd,  $J = 13.5, 4.8$  Hz, 4H)

$^{13}\text{C}$  NMR (DMSO- $d_6$ , 101 MHz),  $\delta_{\text{C}}$  (ppm):  $\delta$  169.66, 163.62, 153.69, 146.76, 134.39, 128.22, 117.99, 115.67, 114.78, 67.12, 42.51, 36.57

**(7)**

Proton-NMR (400 MHz, CHLOROFORM- $D$ )  $\delta_{\text{H}}$  (ppm):  $\delta$  7.80 (s, 2n), 7.54 (d,  $J = 6.3$  Hz, 2n), 7.20 (t,  $J = 8.5$  Hz, 2n), 6.75-6.69 (2n), 6.60-6.64 (m, 2n), 6.42 (s, 2n), 1.75-1.90 (m, 8n)

Carbon13-NMR (DMSO- $D_6$ , 100 MHz)  $\delta_{\text{C}}$  (ppm):  $\delta$  163.80, 146.97, 133.87, 127.85, 117.56, 115.38, 115.32, 67.26, 32.58.

**(9)**

$^1\text{H}$  NMR (DMSO- $d_6$ , 400 MHz),  $\delta_{\text{H}}$  (ppm):  $\delta$  8.33 (s, 2H), 7.54 (d,  $J = 6.6$  Hz, 2H), 7.43 (s, 4H), 7.19 (t, 2H), 7.12 (s, 2H), 6.68 (d,  $J = 8.1$  Hz, 2H), 6.61 (t, 2H), 5.69 (s, 2H)

$^{13}\text{C}$  NMR (DMSO- $d_6$ , 100 MHz),  $\delta_{\text{C}}$  (ppm):  $\delta$  164.09, 148.20, 142.49, 133.87, 127.87, 127.19, 117.63, 115.49, 114.96, 66.42.

# <sup>1</sup>H and <sup>13</sup>C NMR spectra

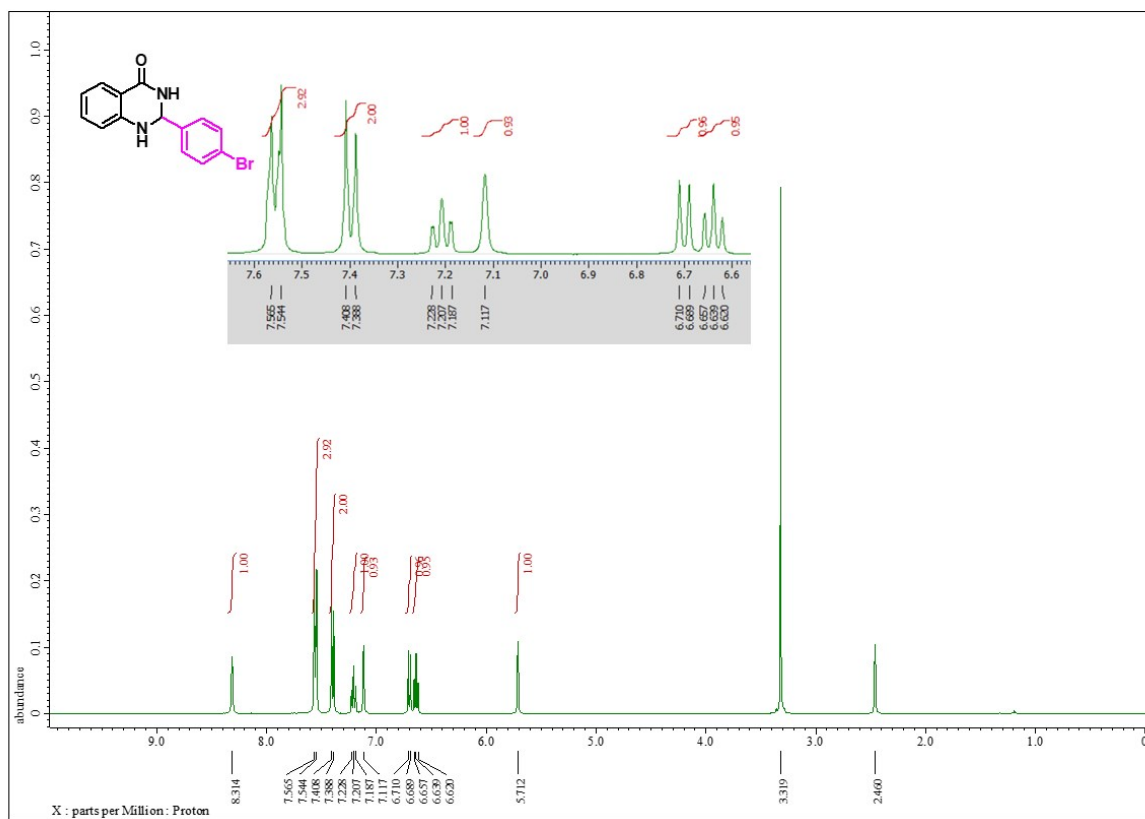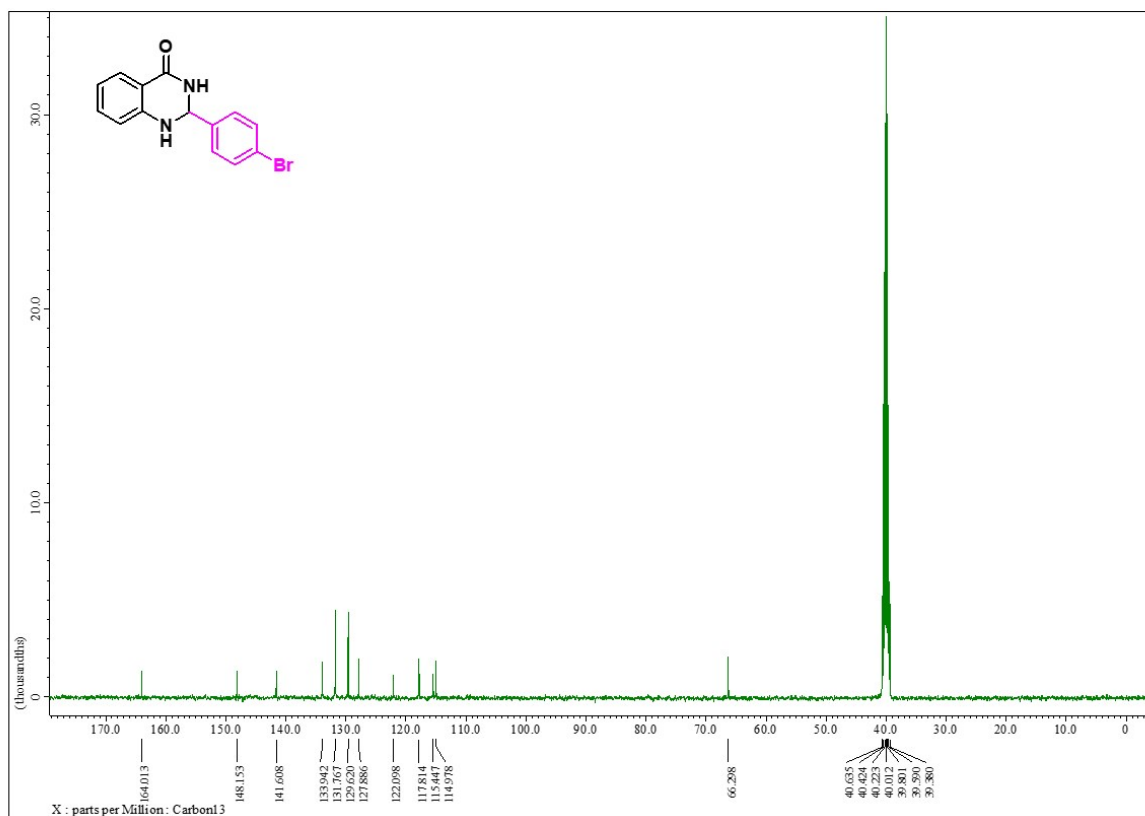

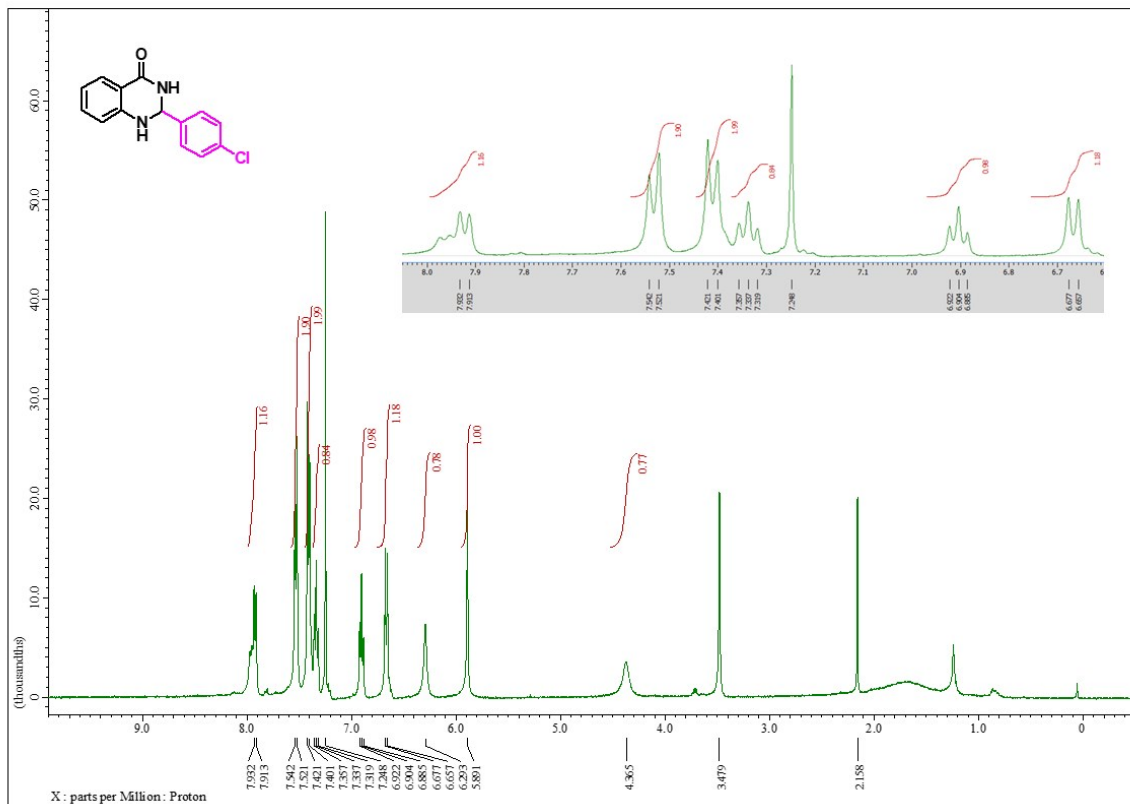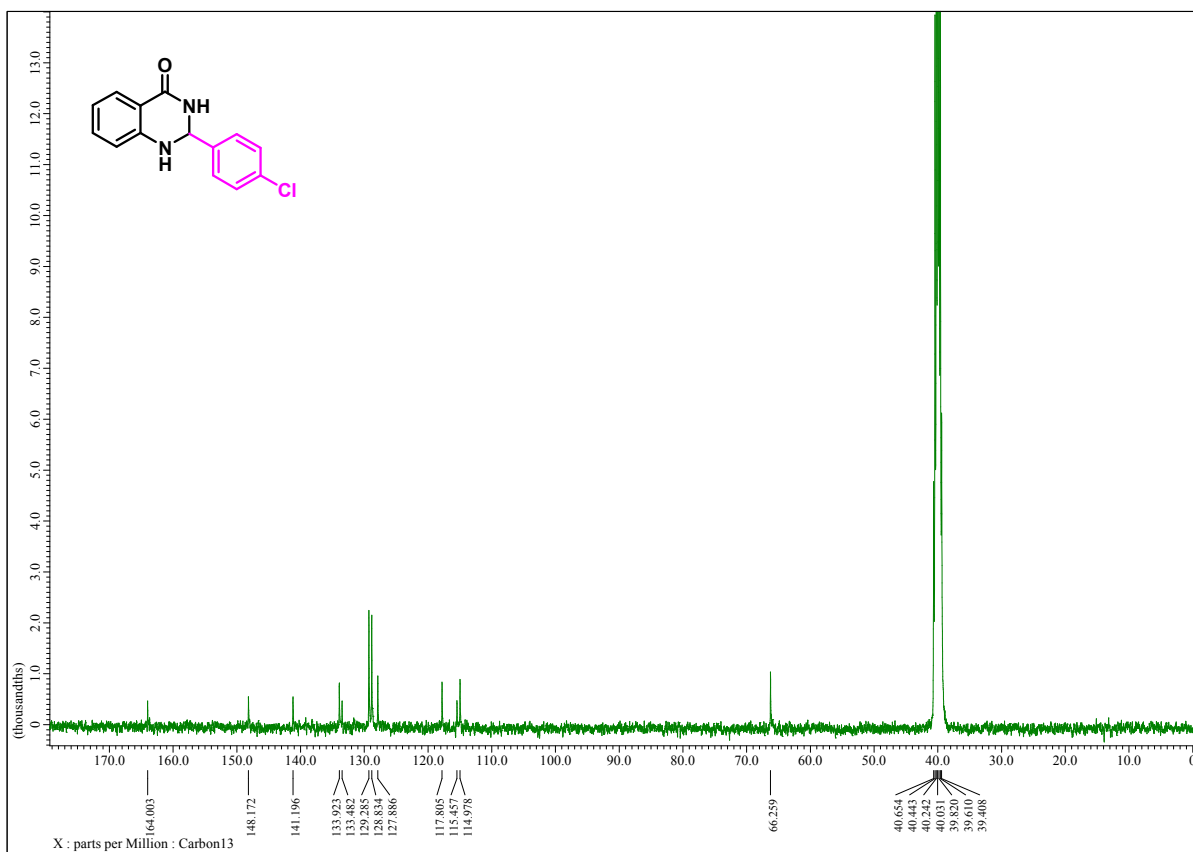

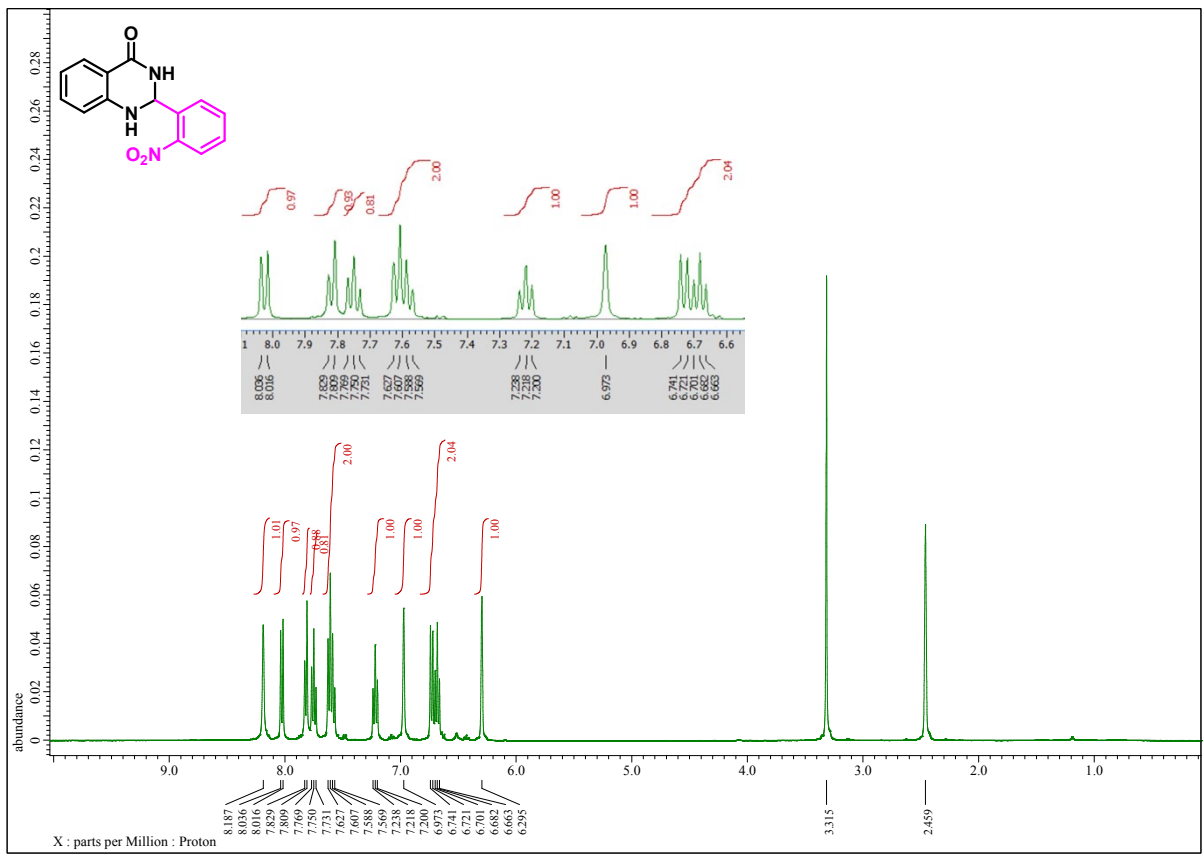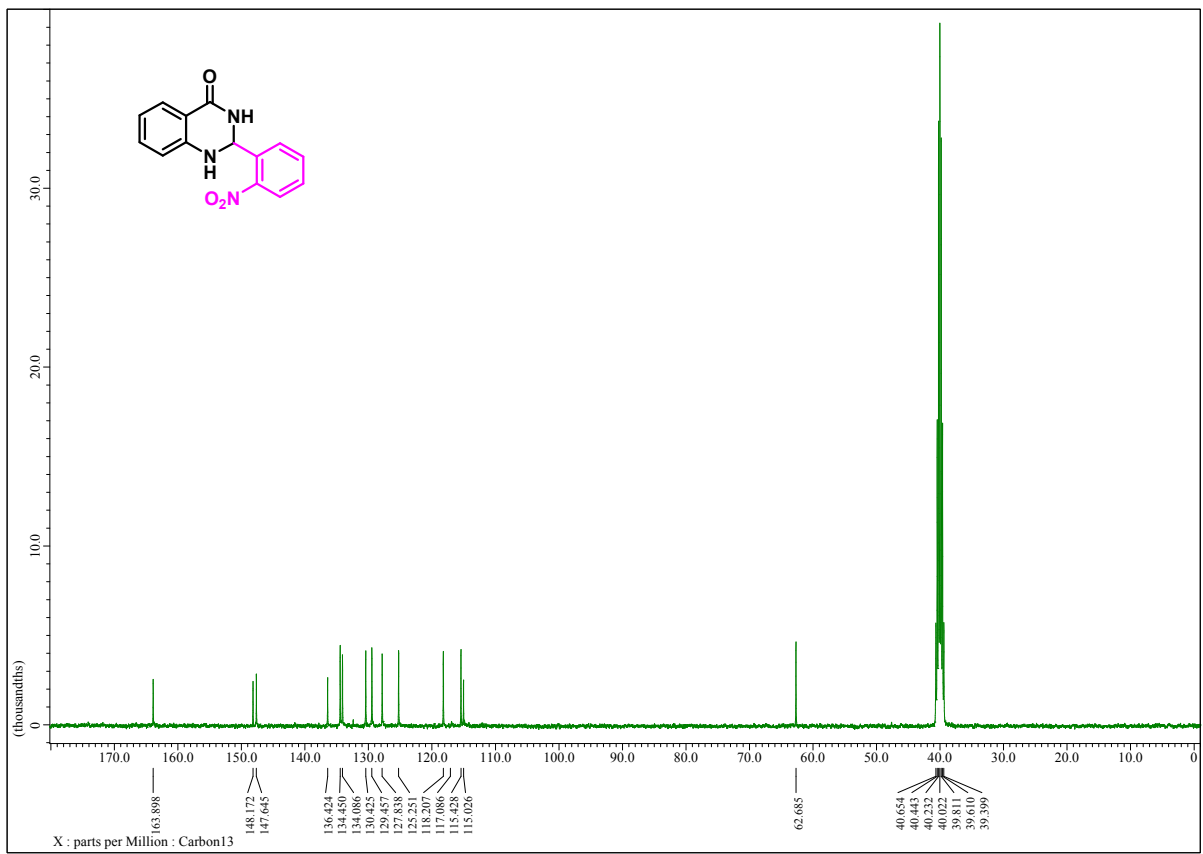

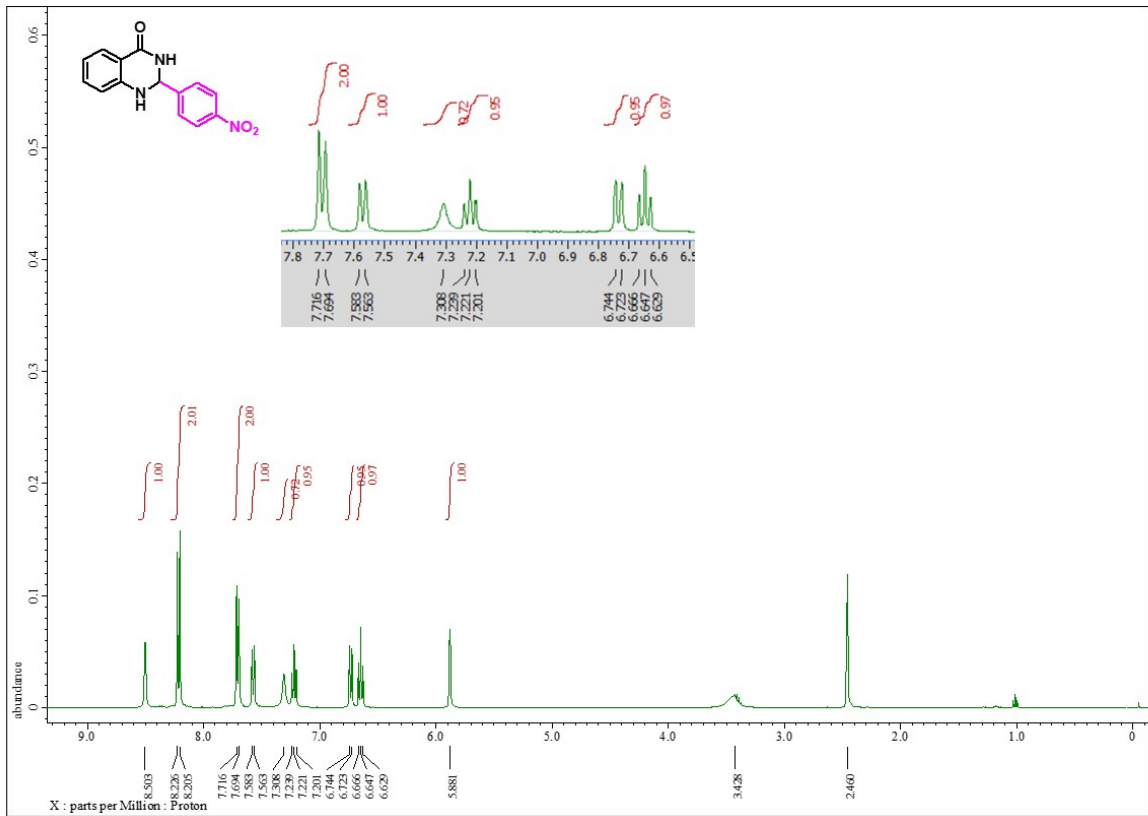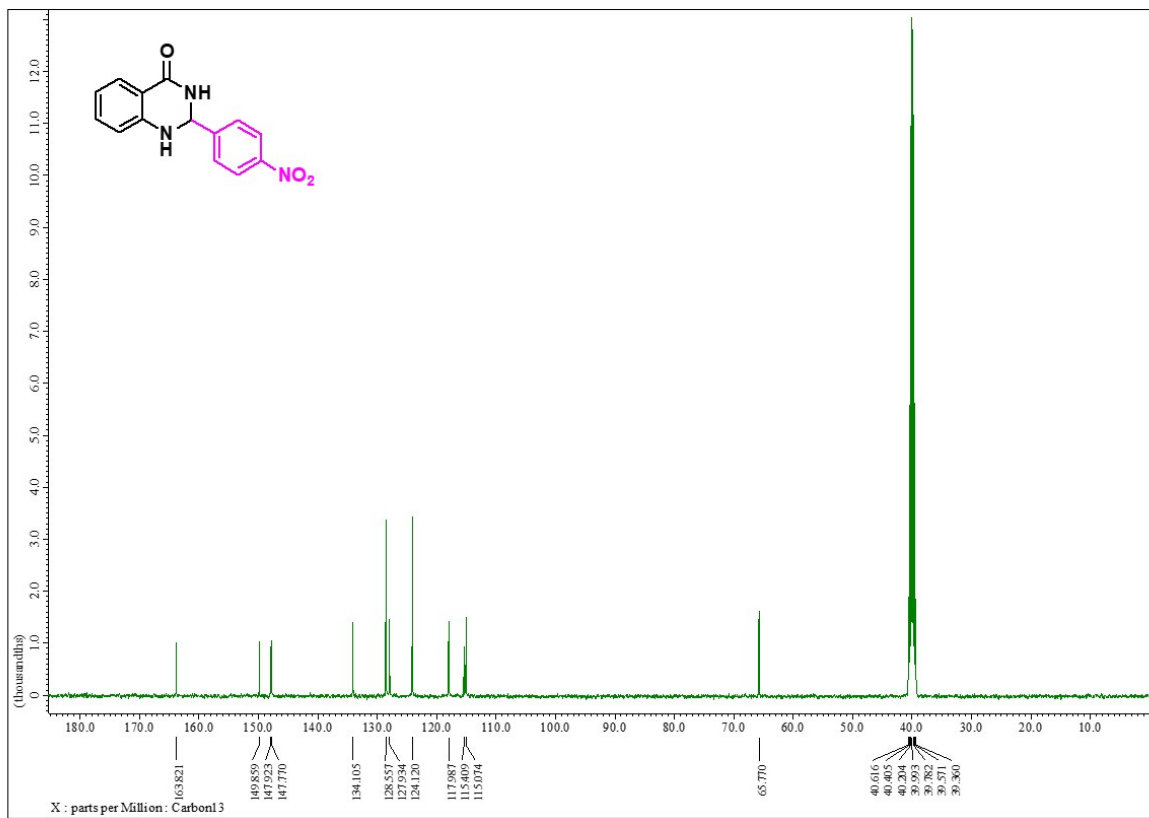

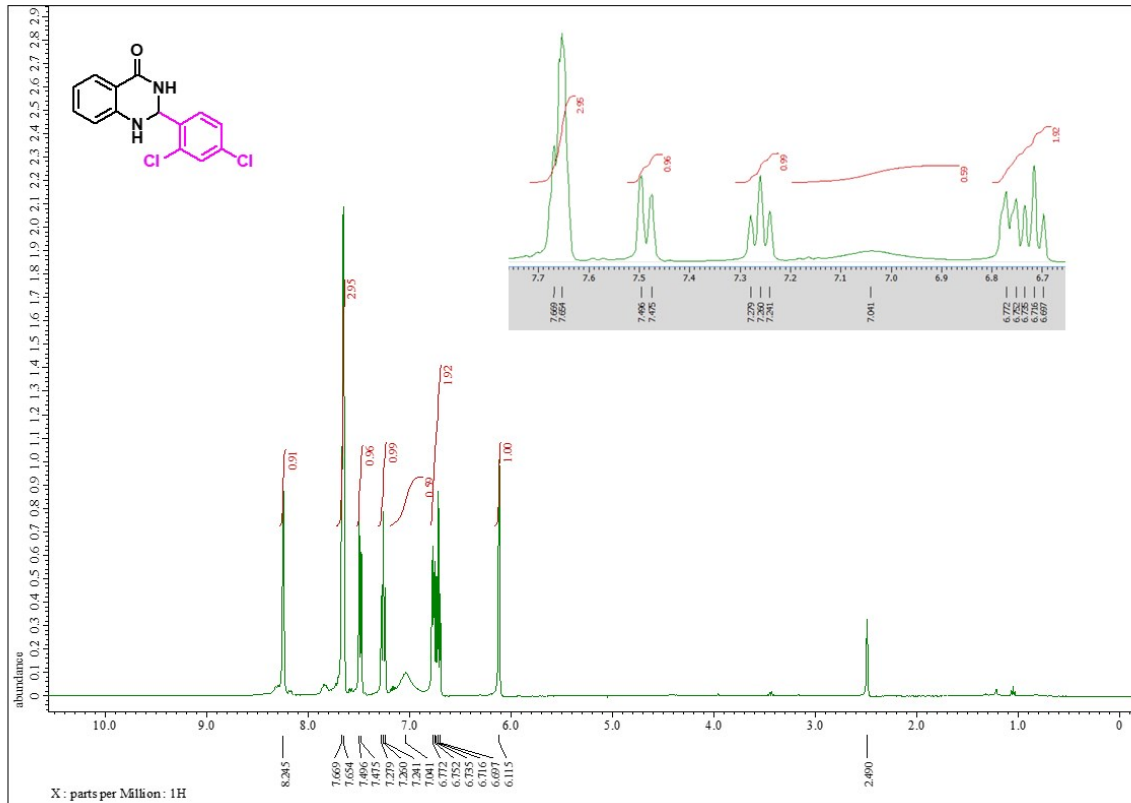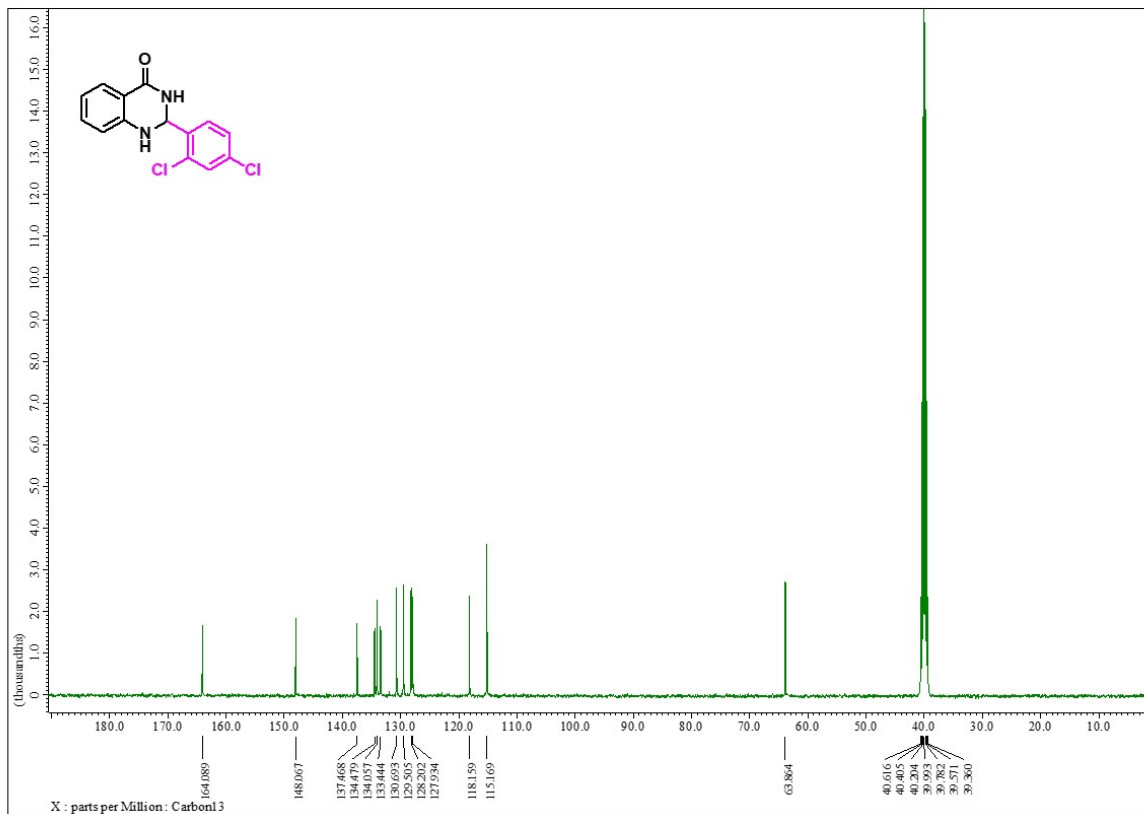

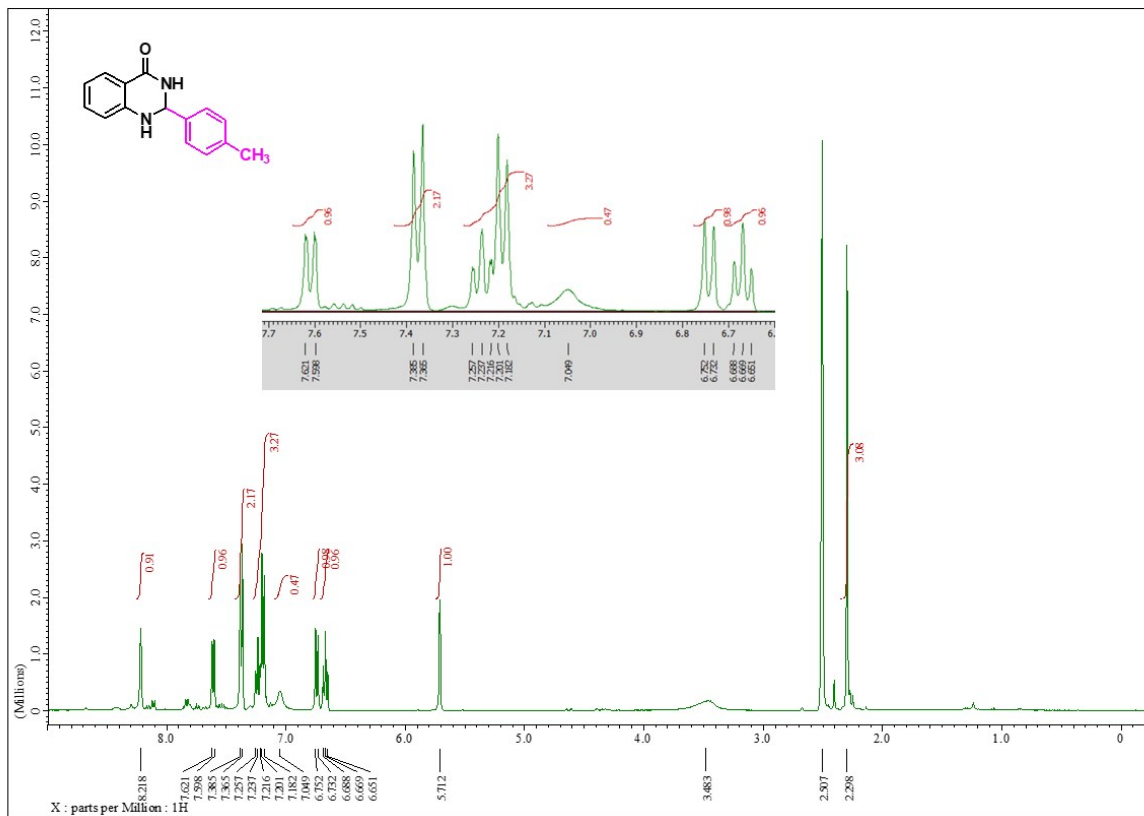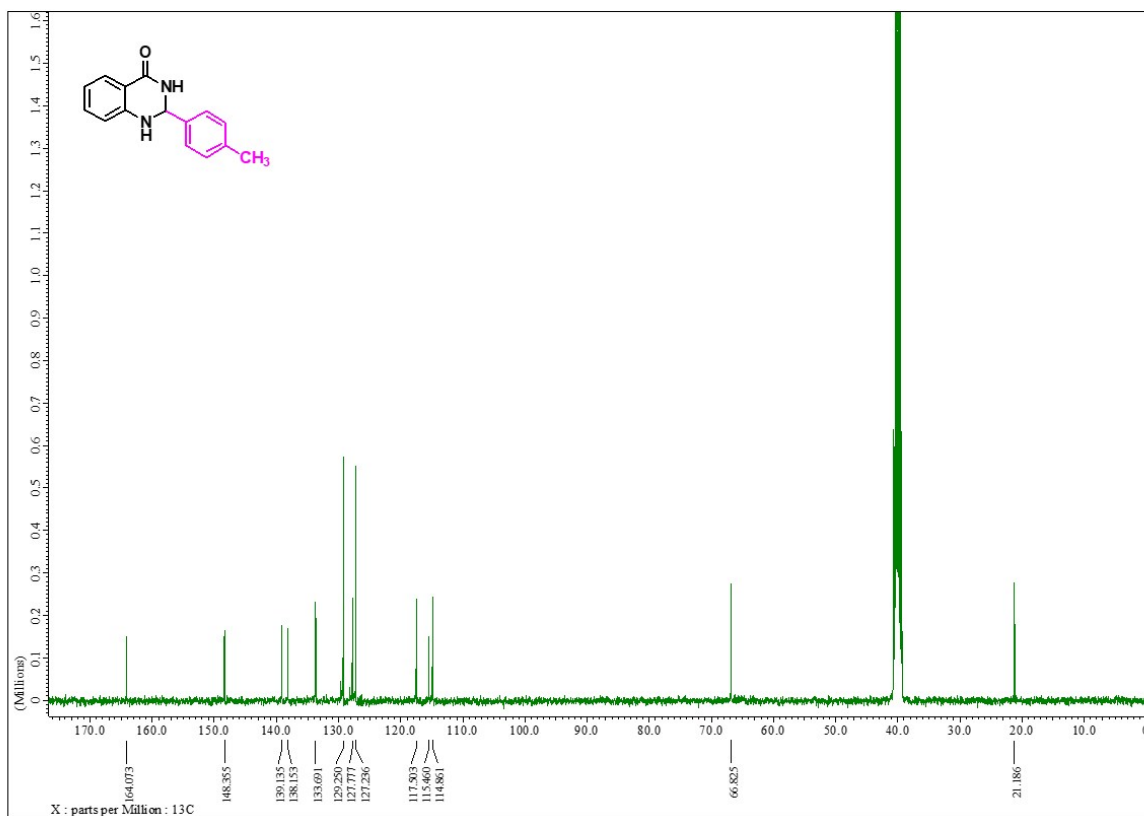



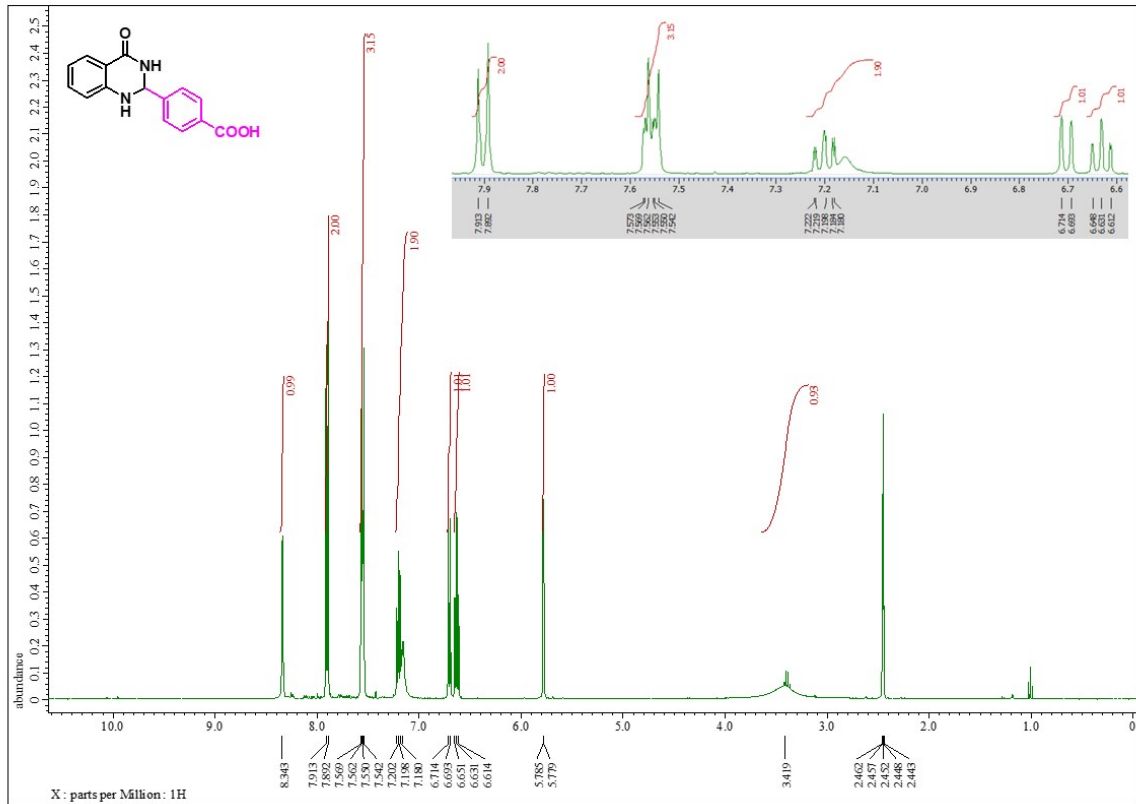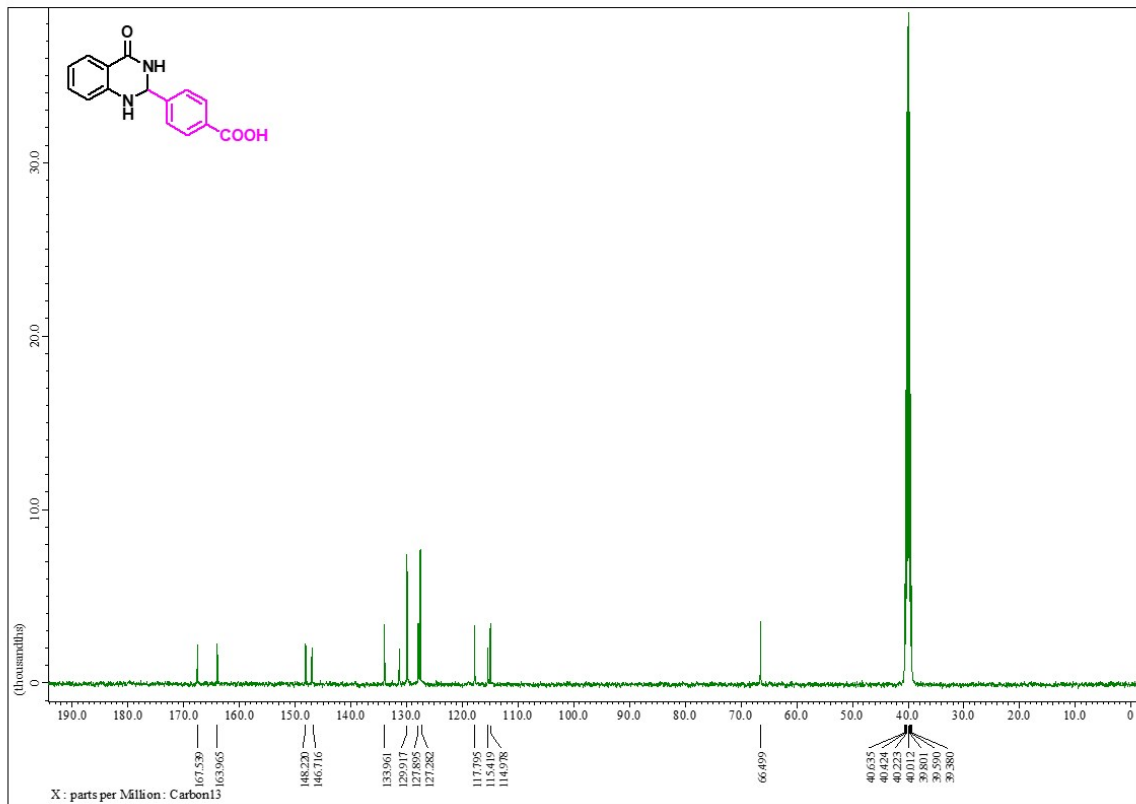

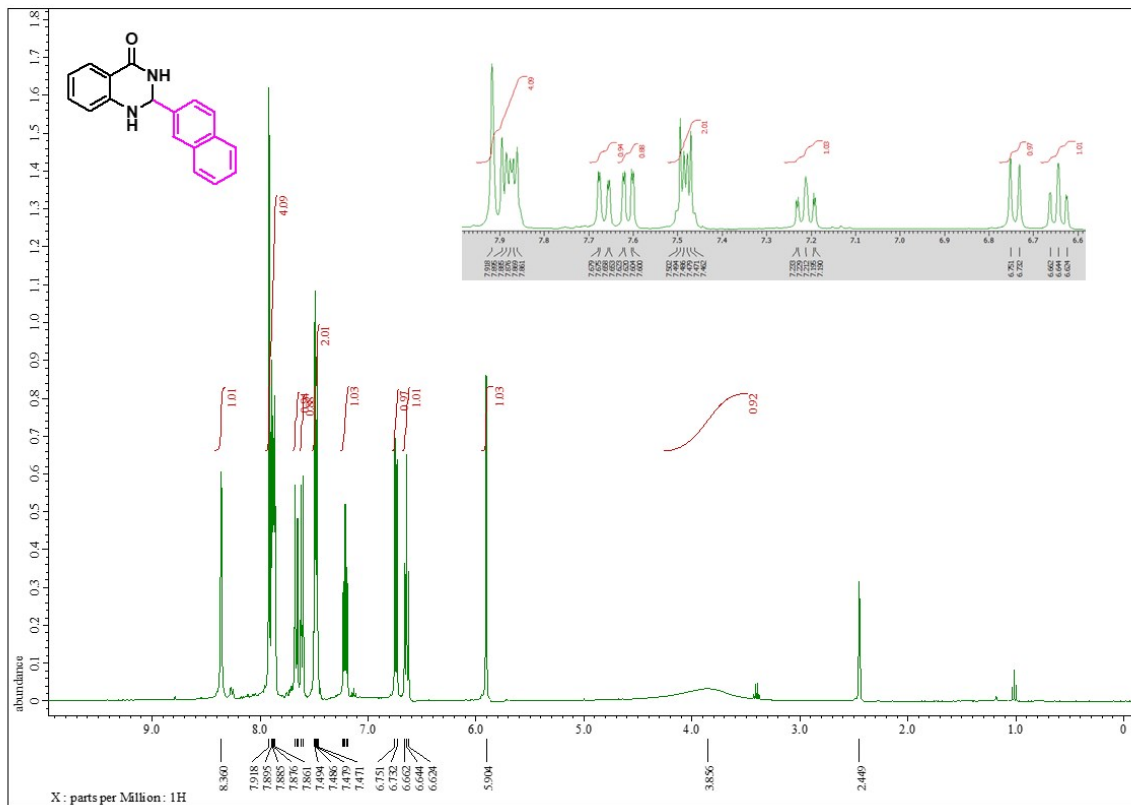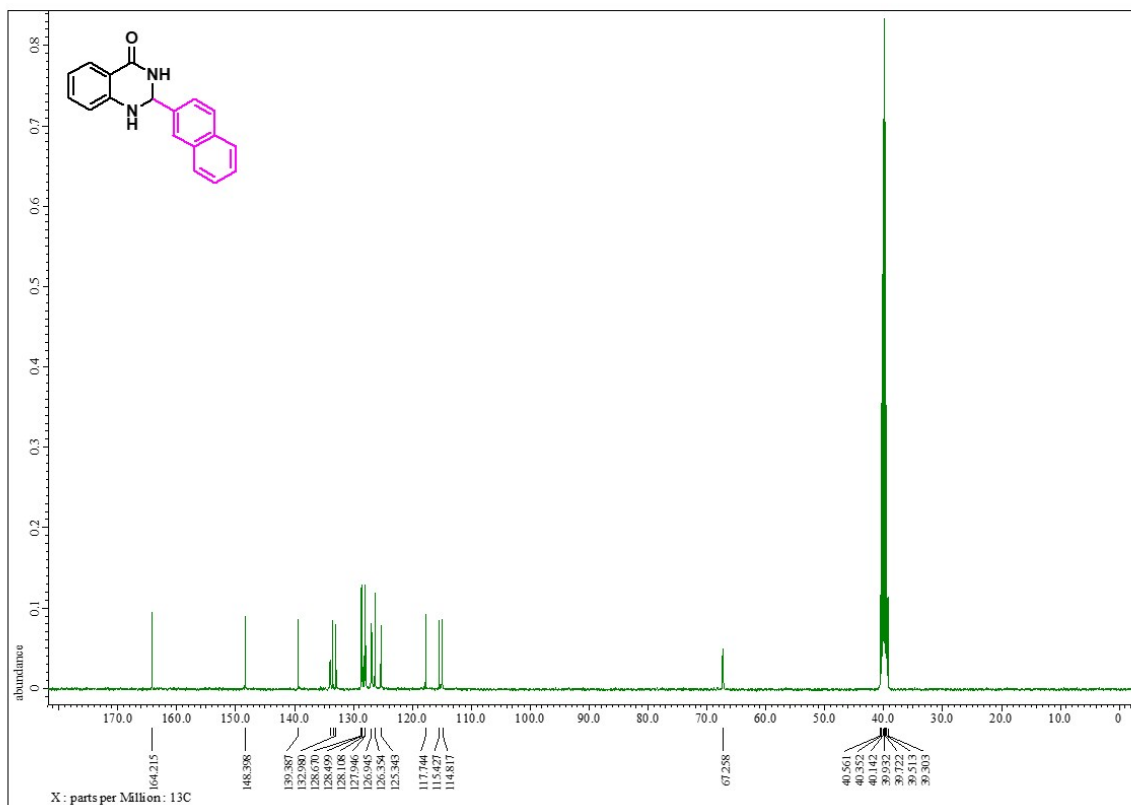

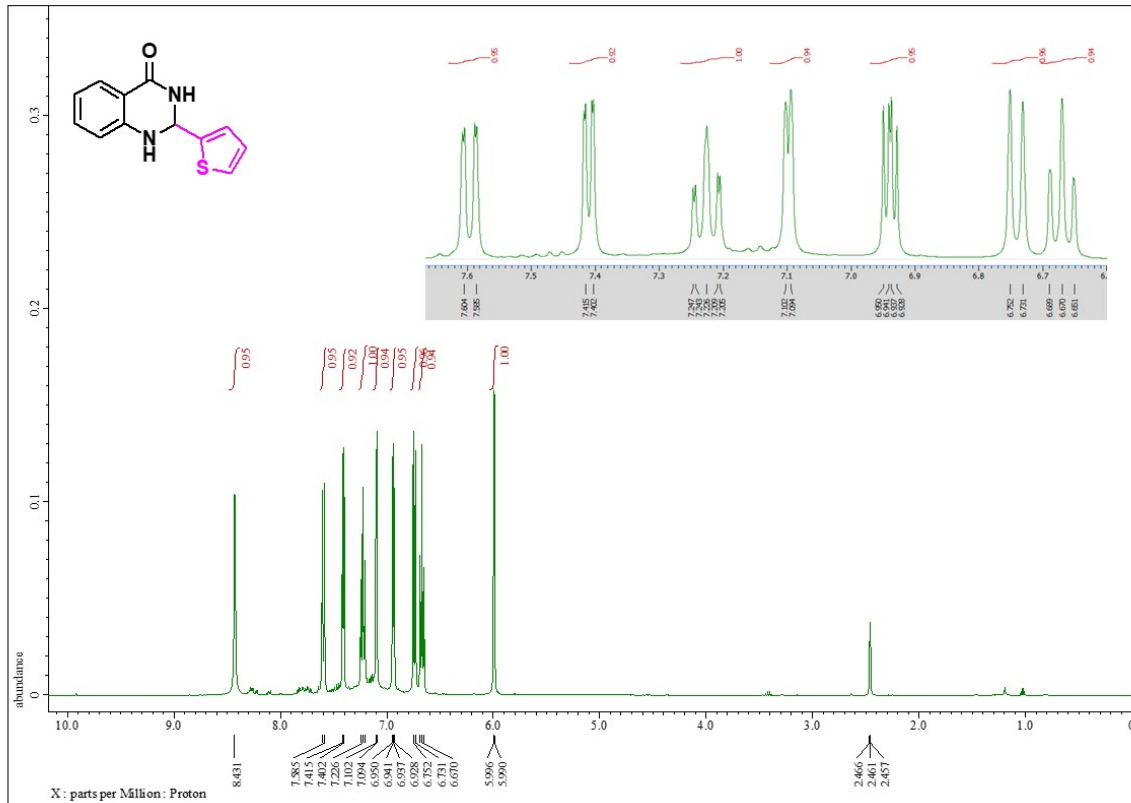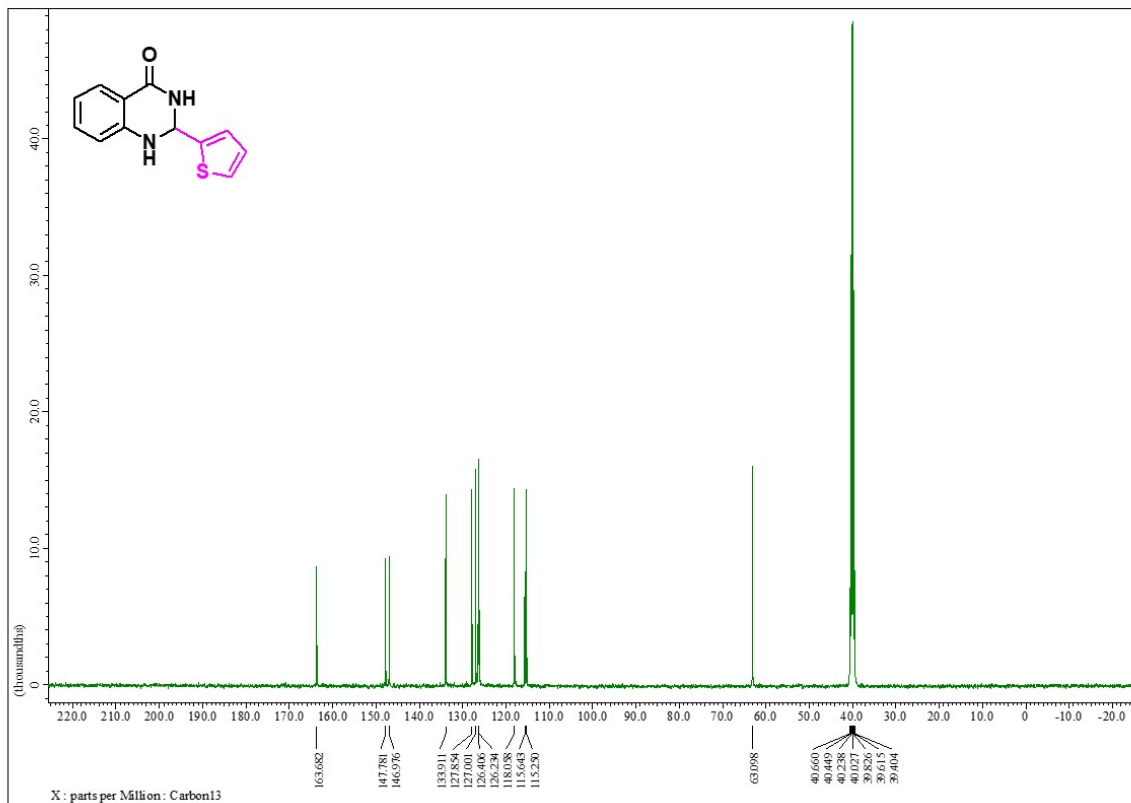

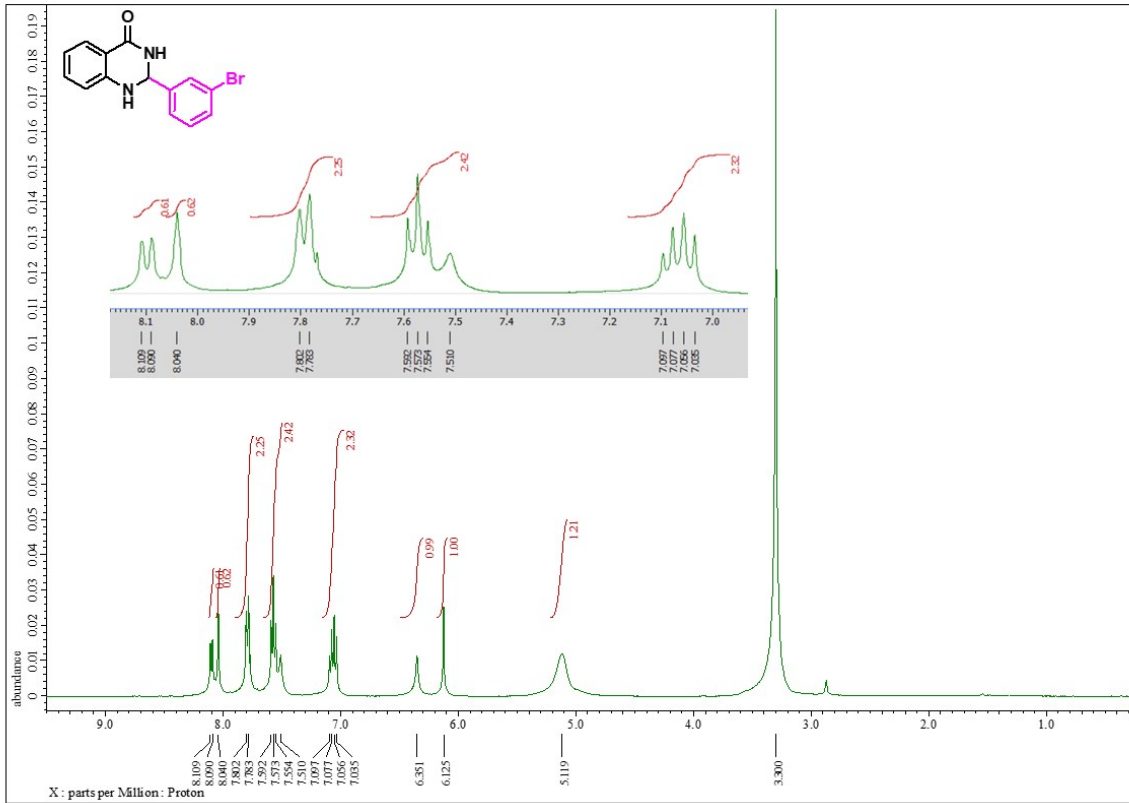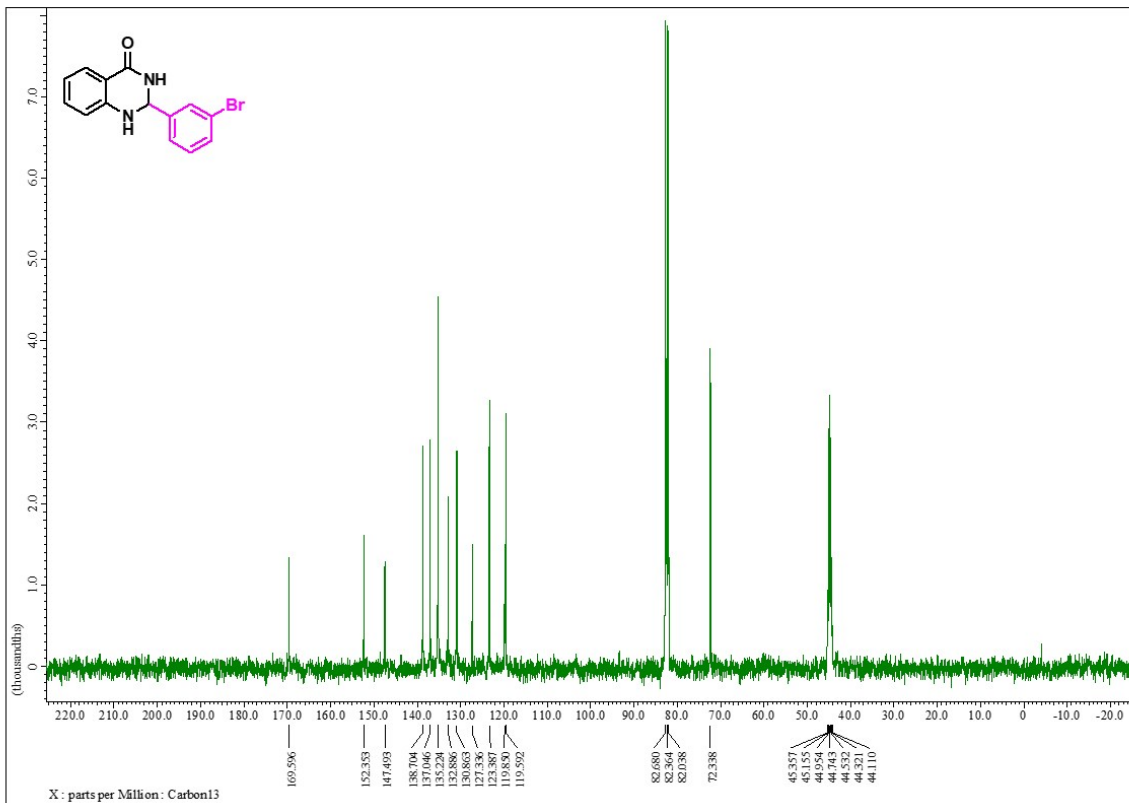

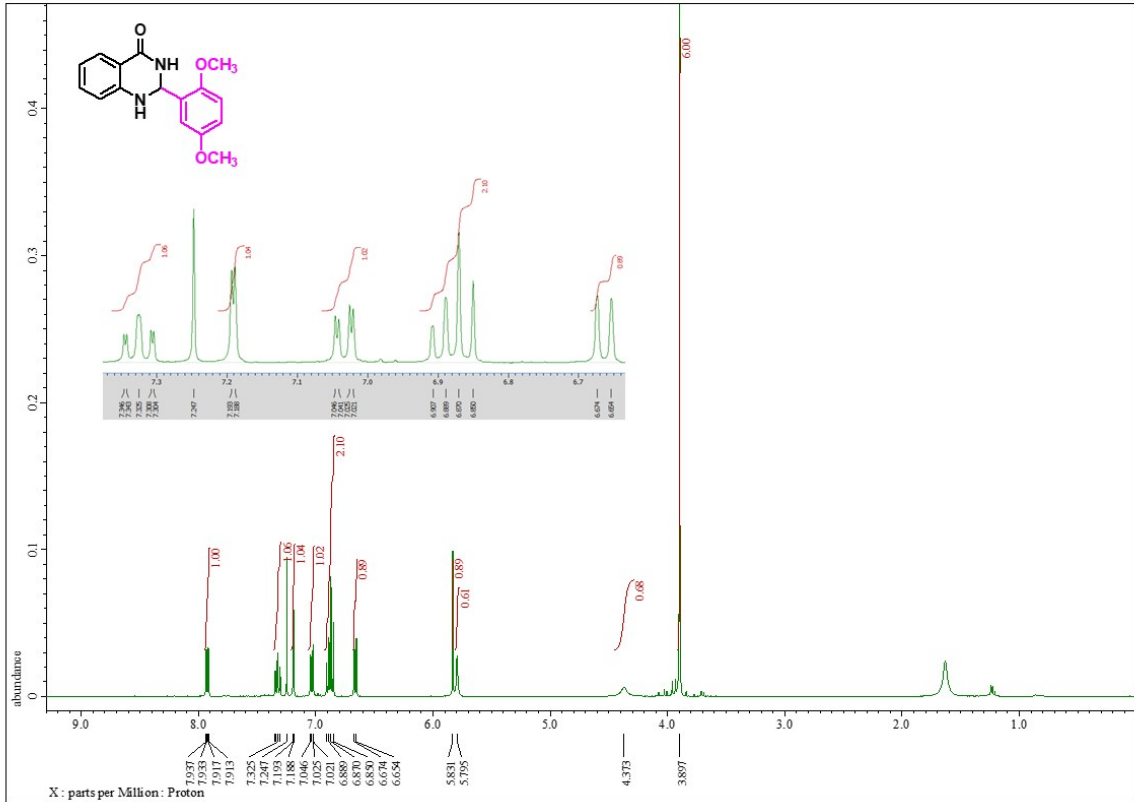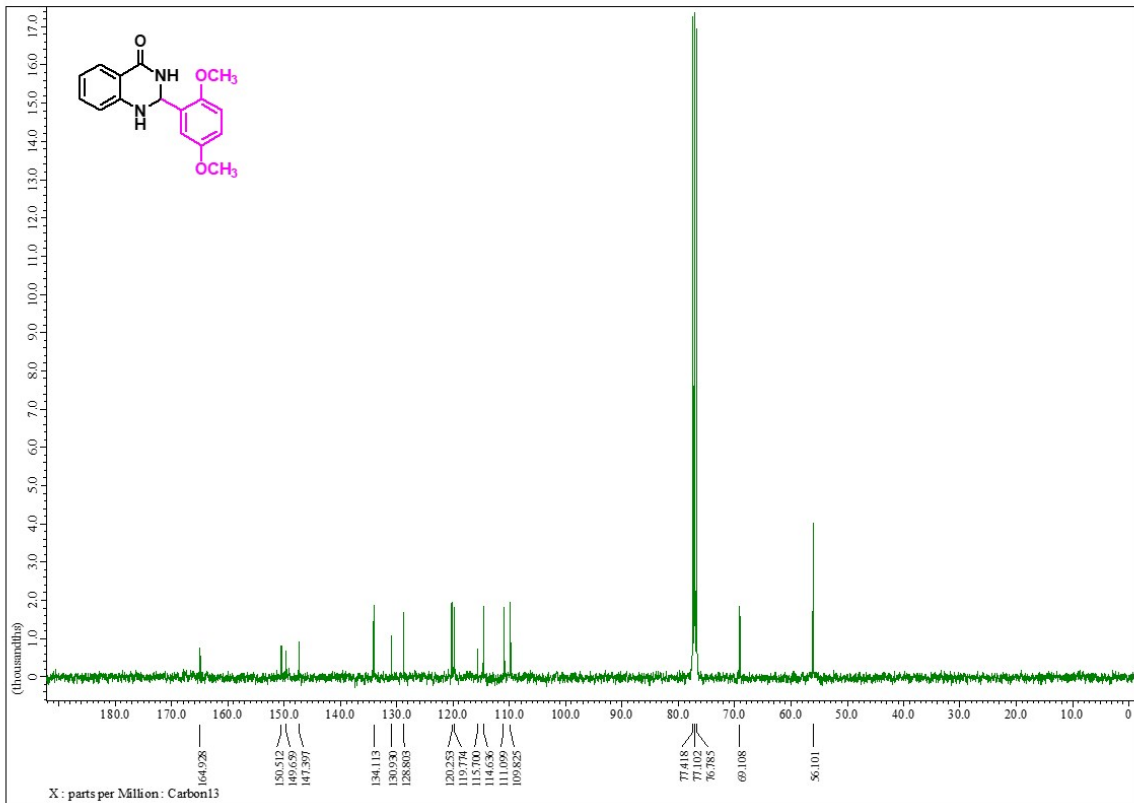

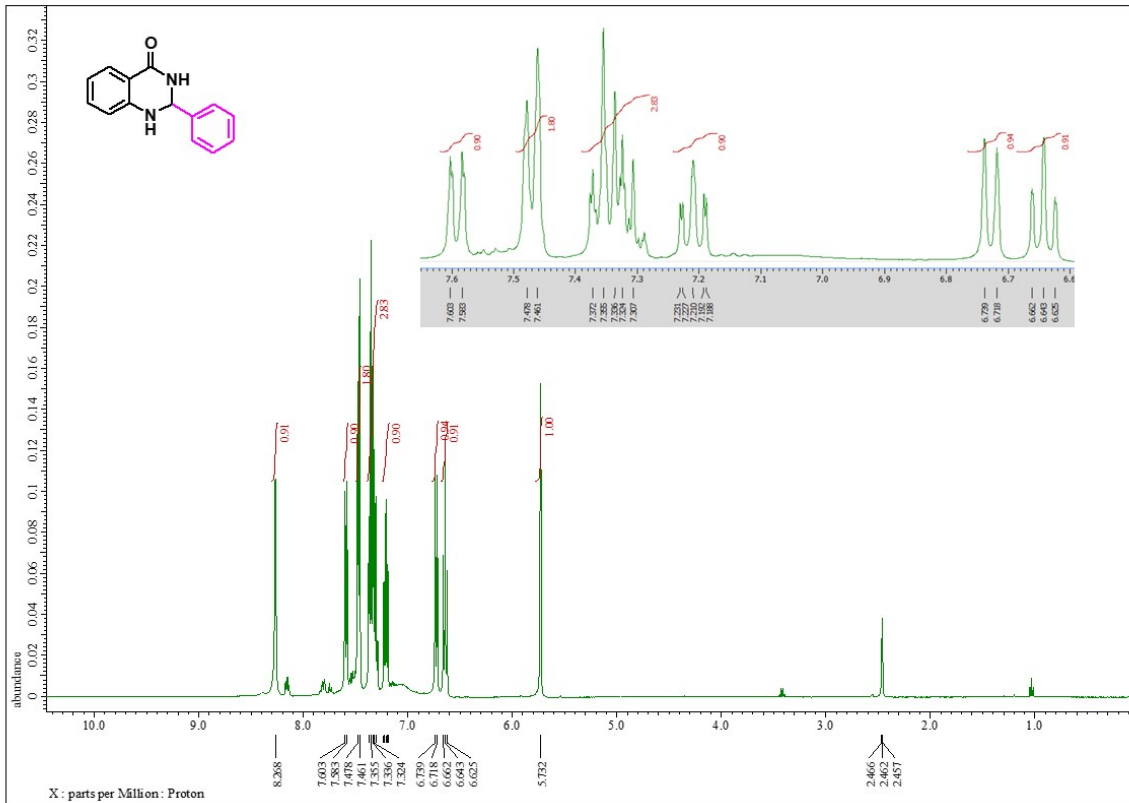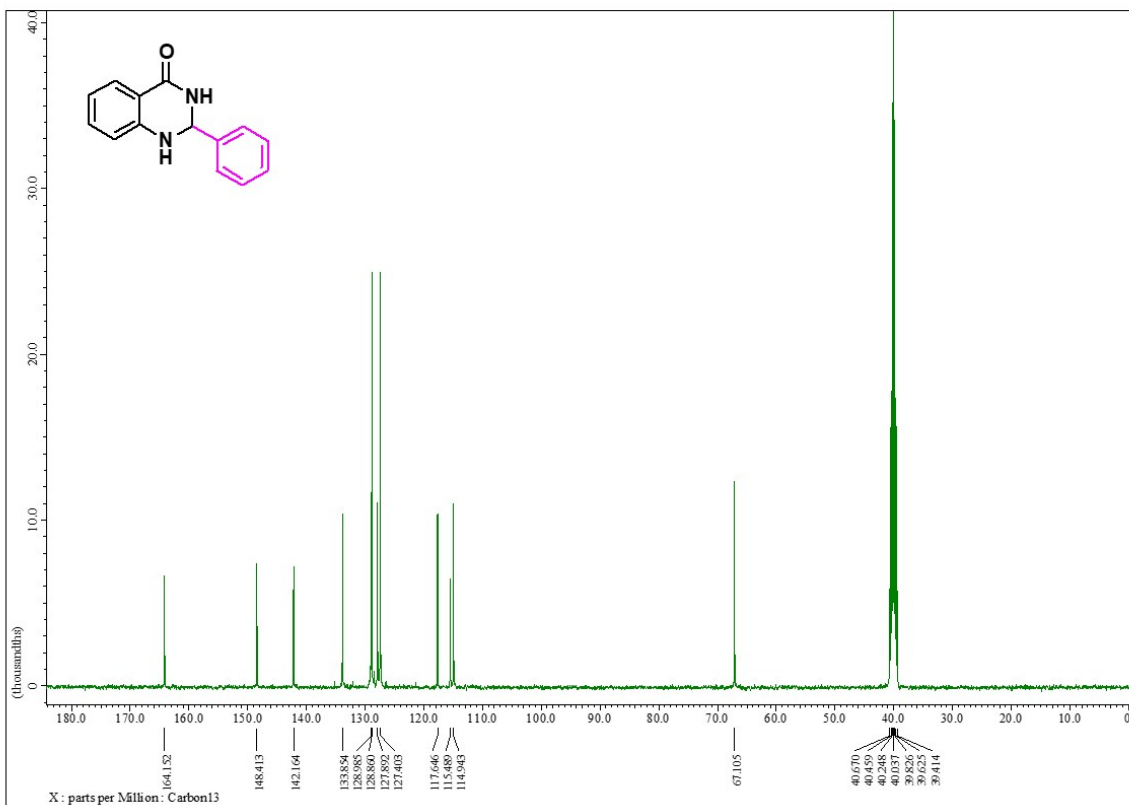

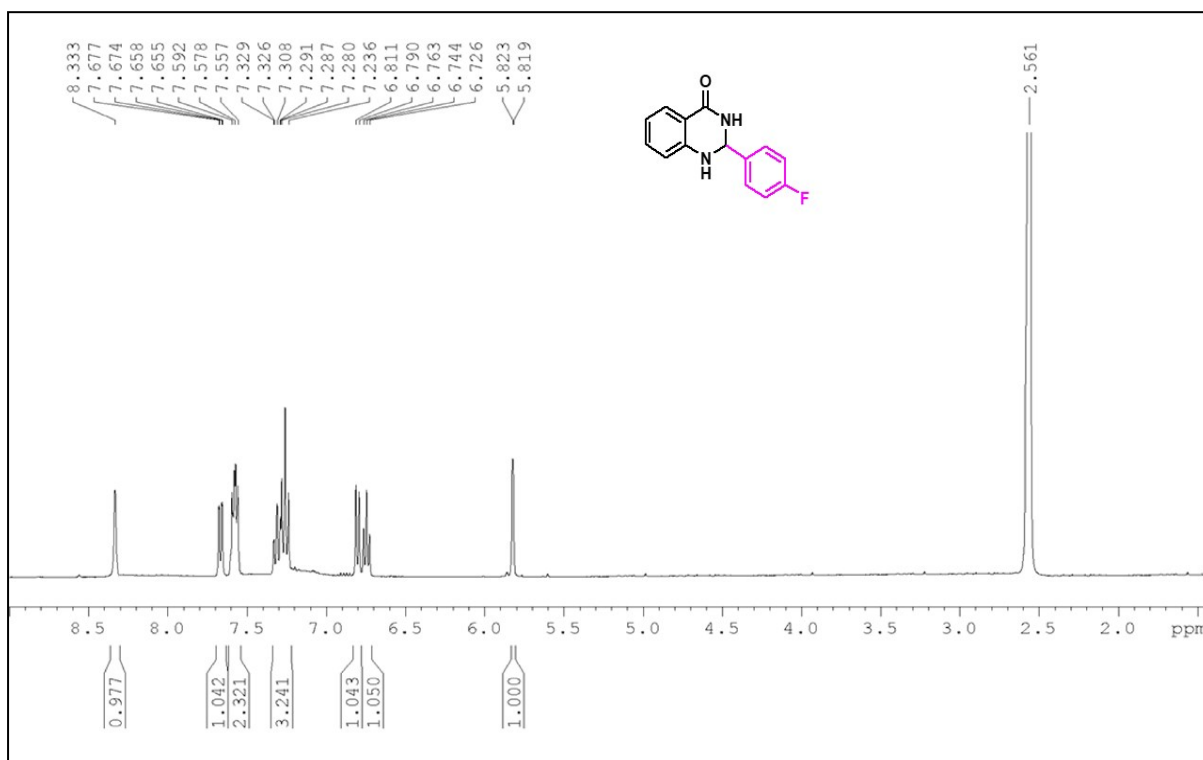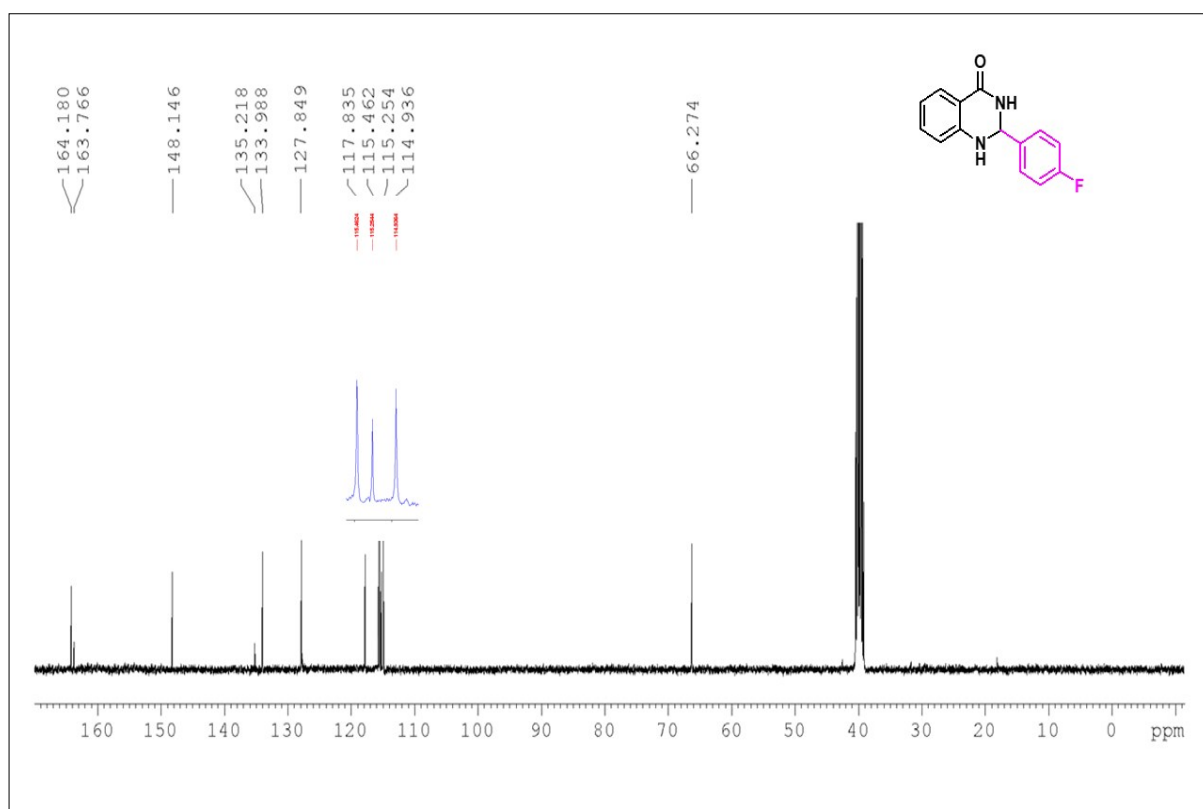

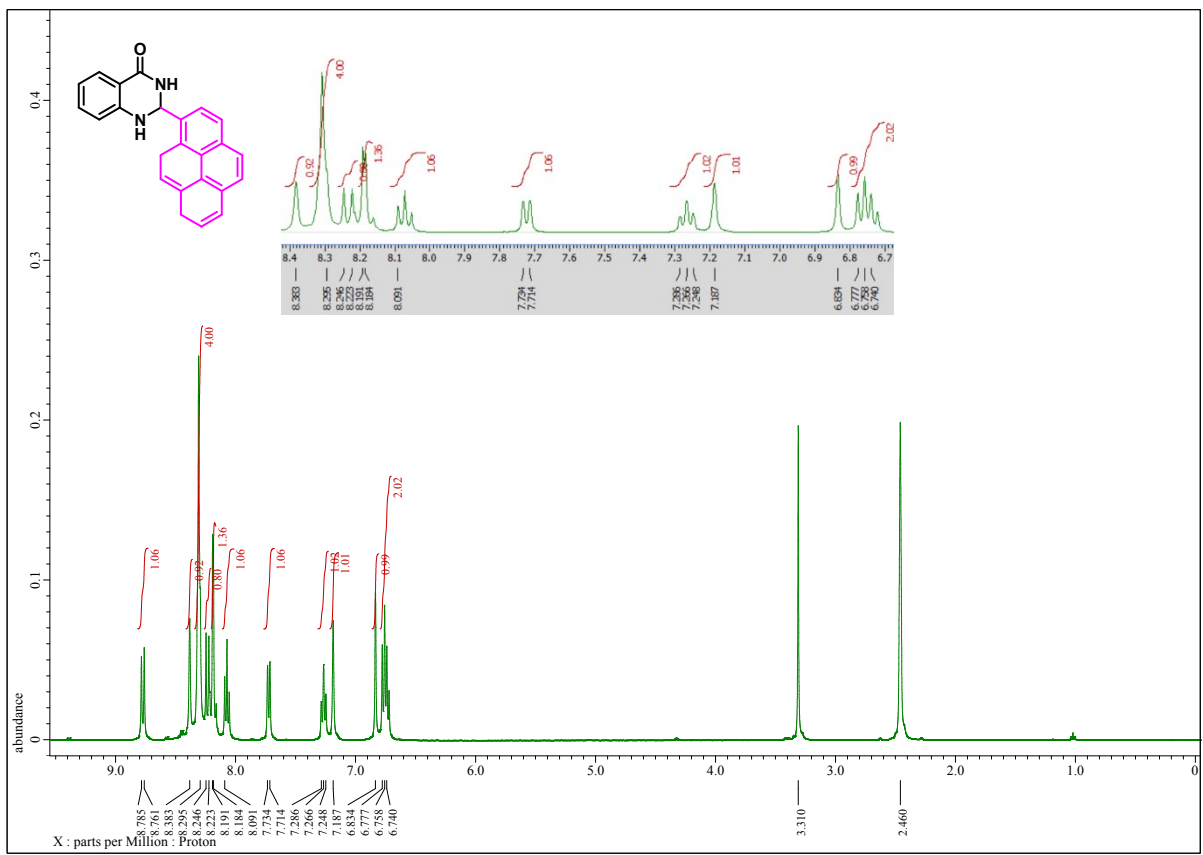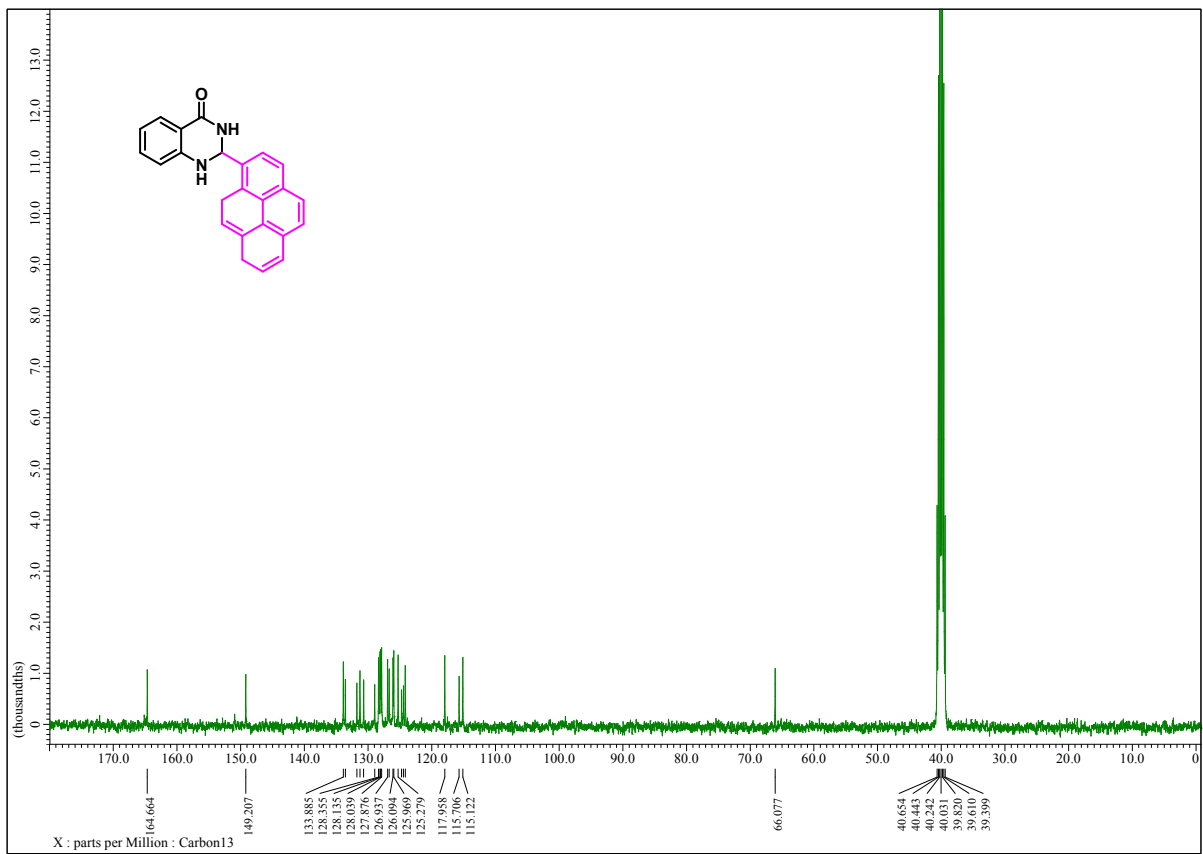



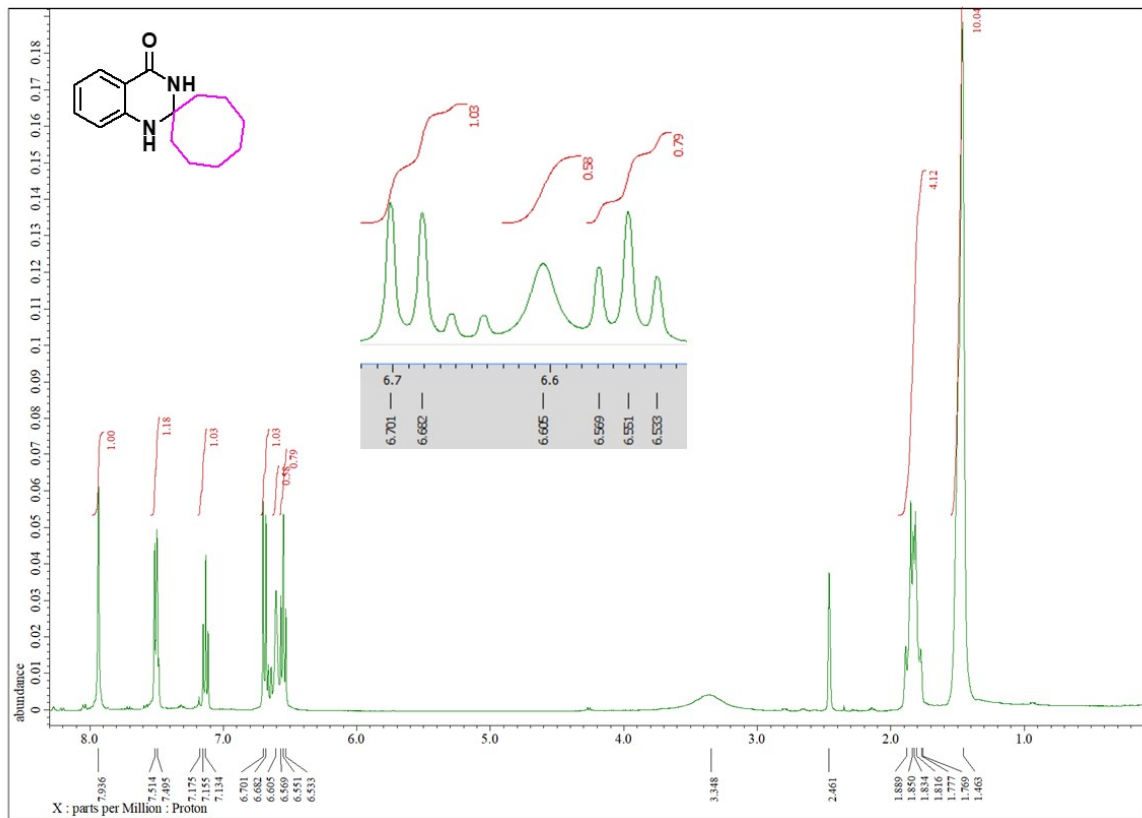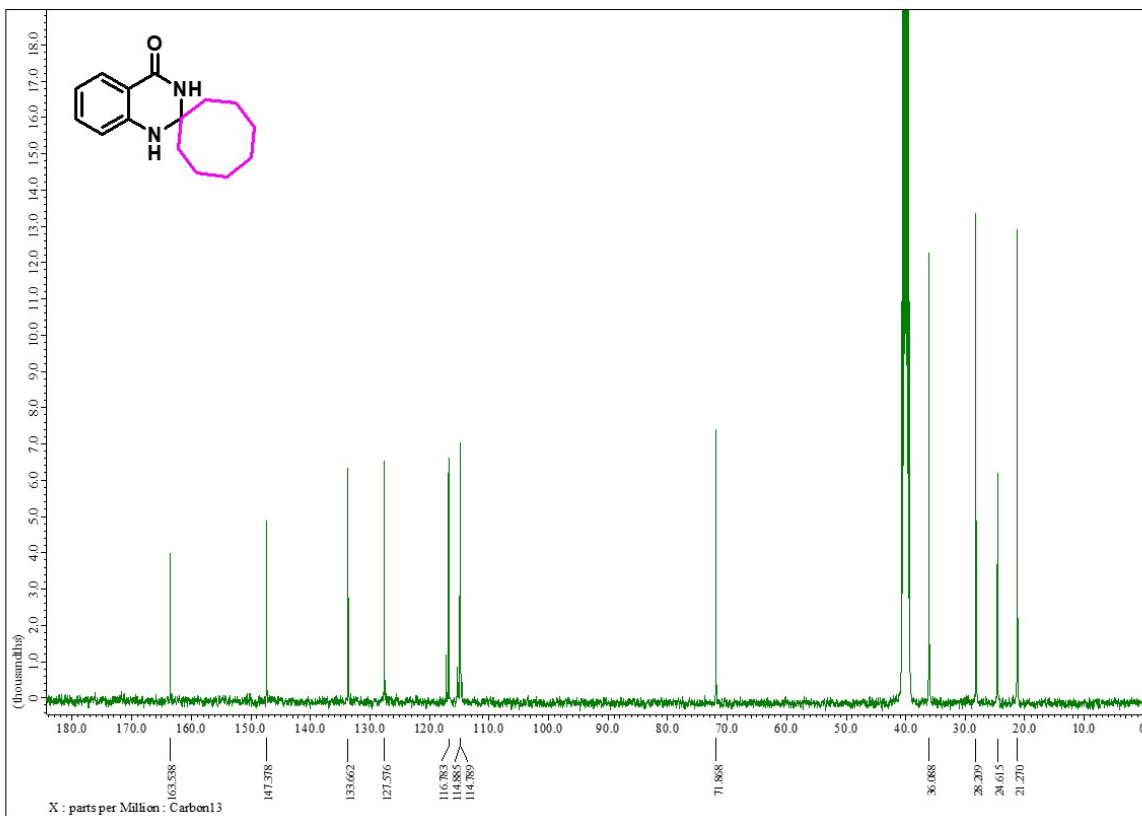

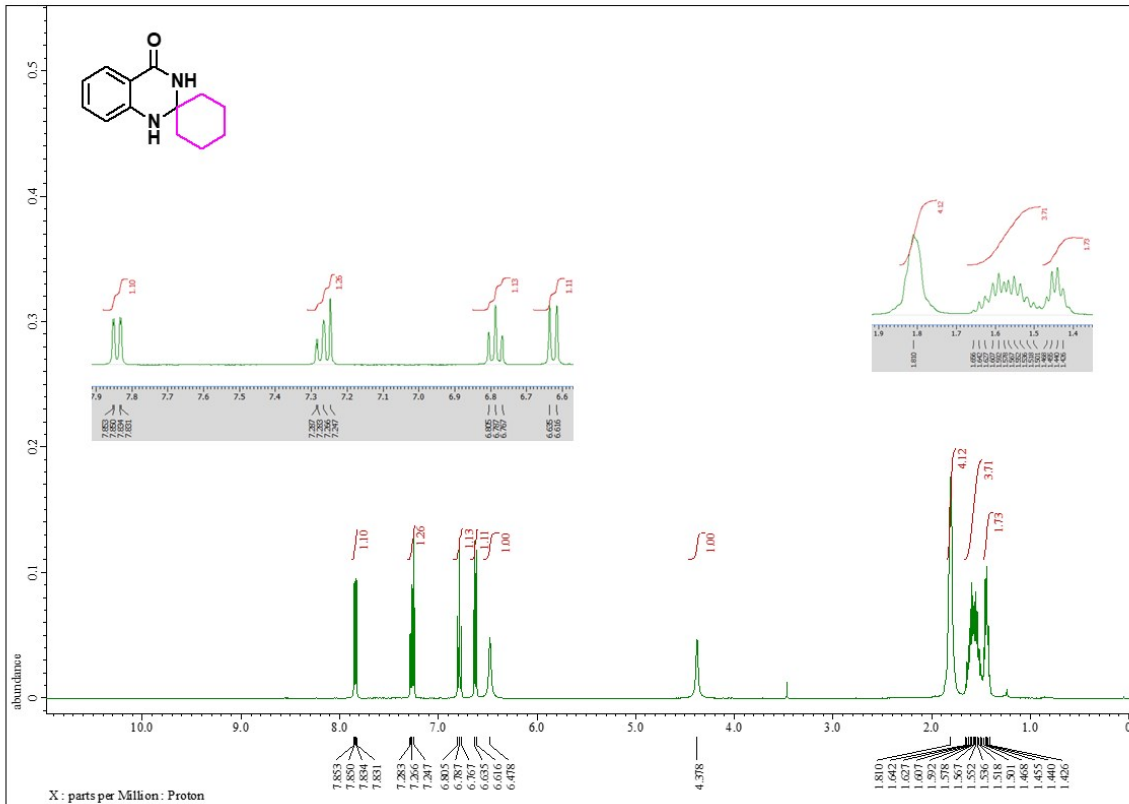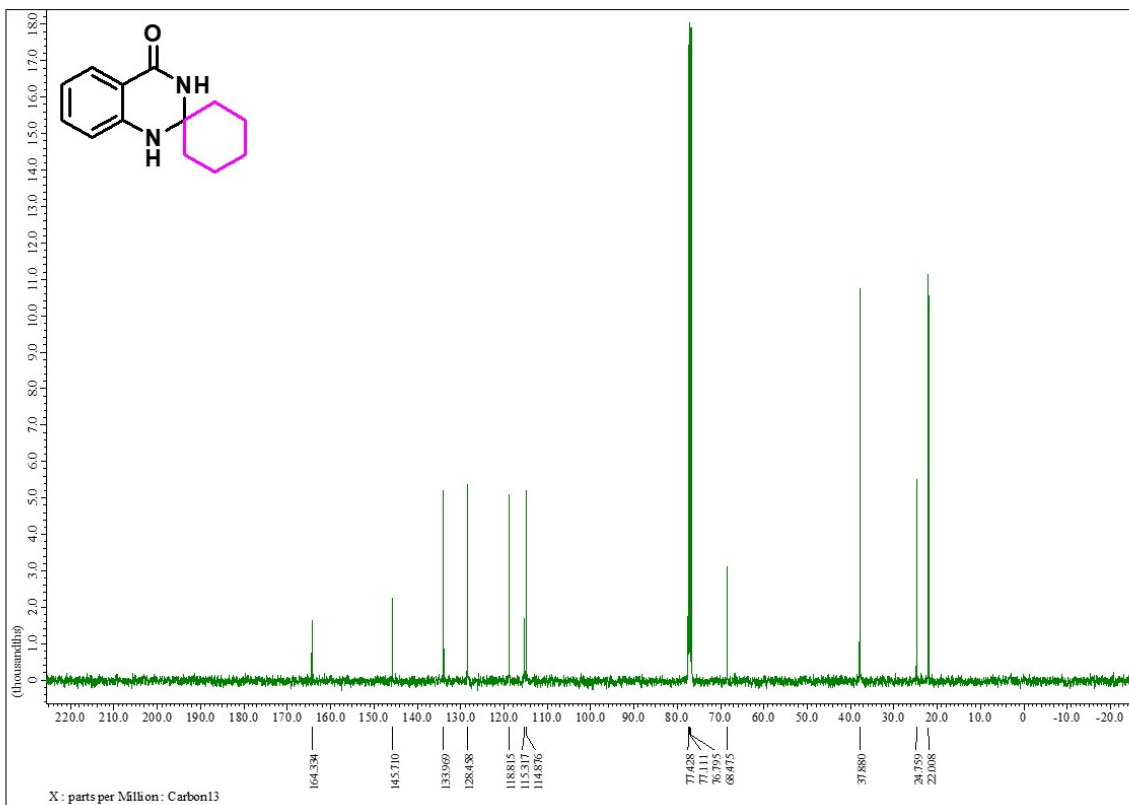

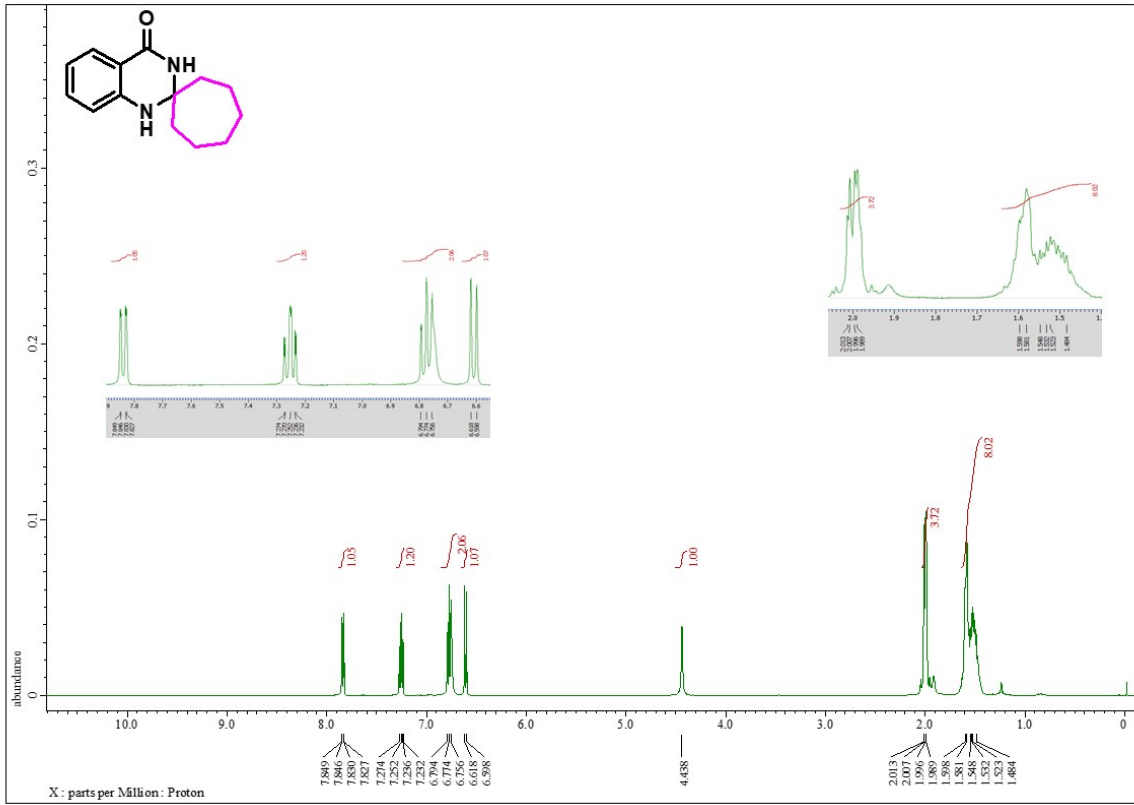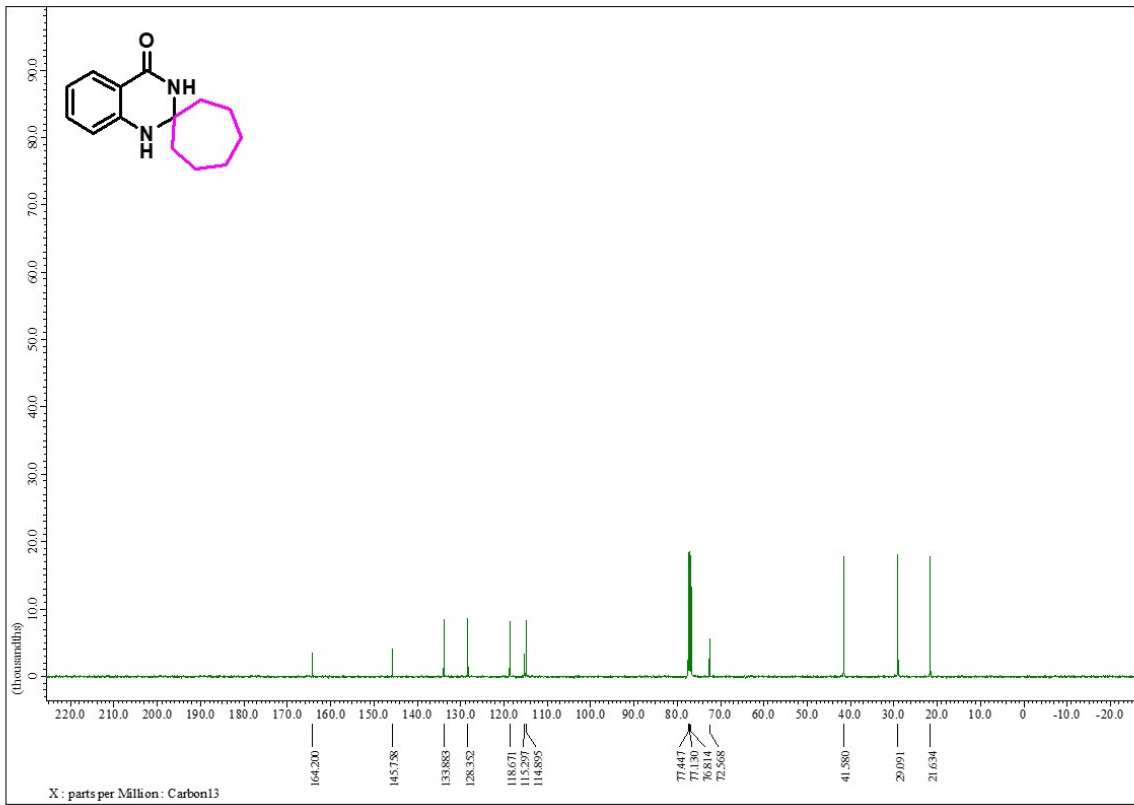

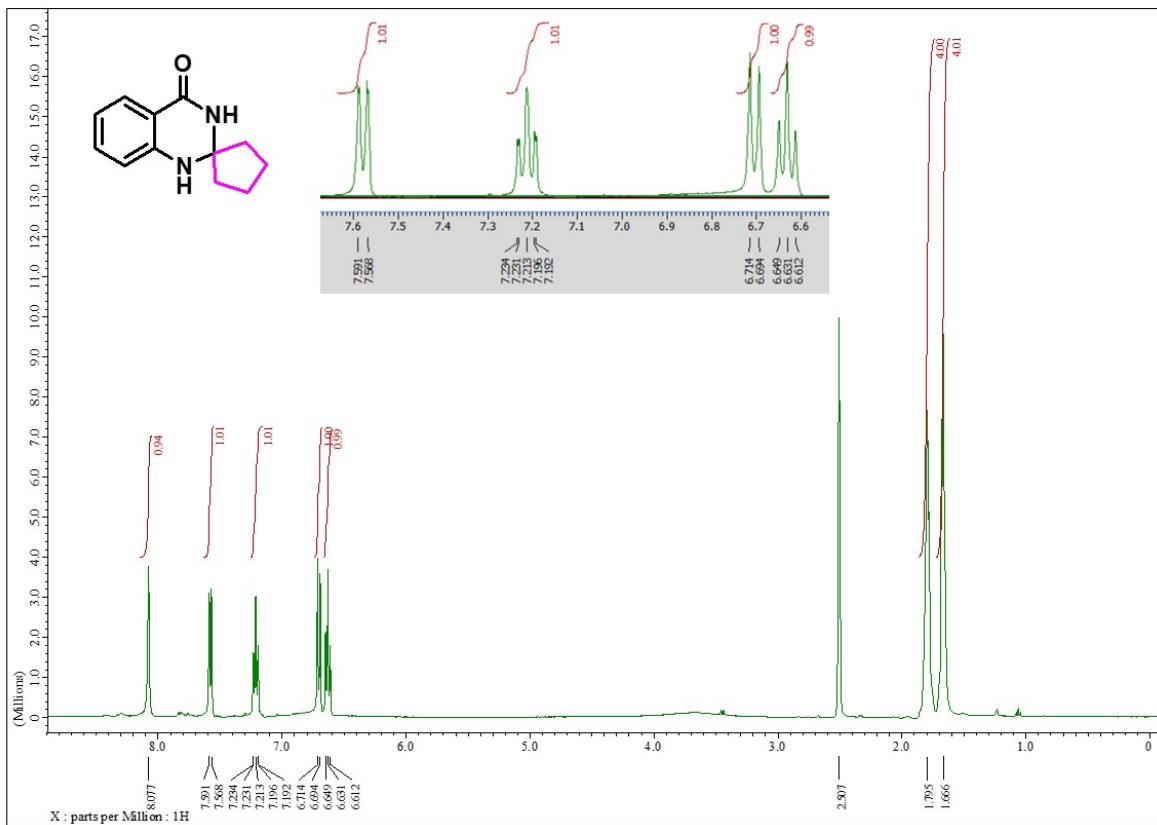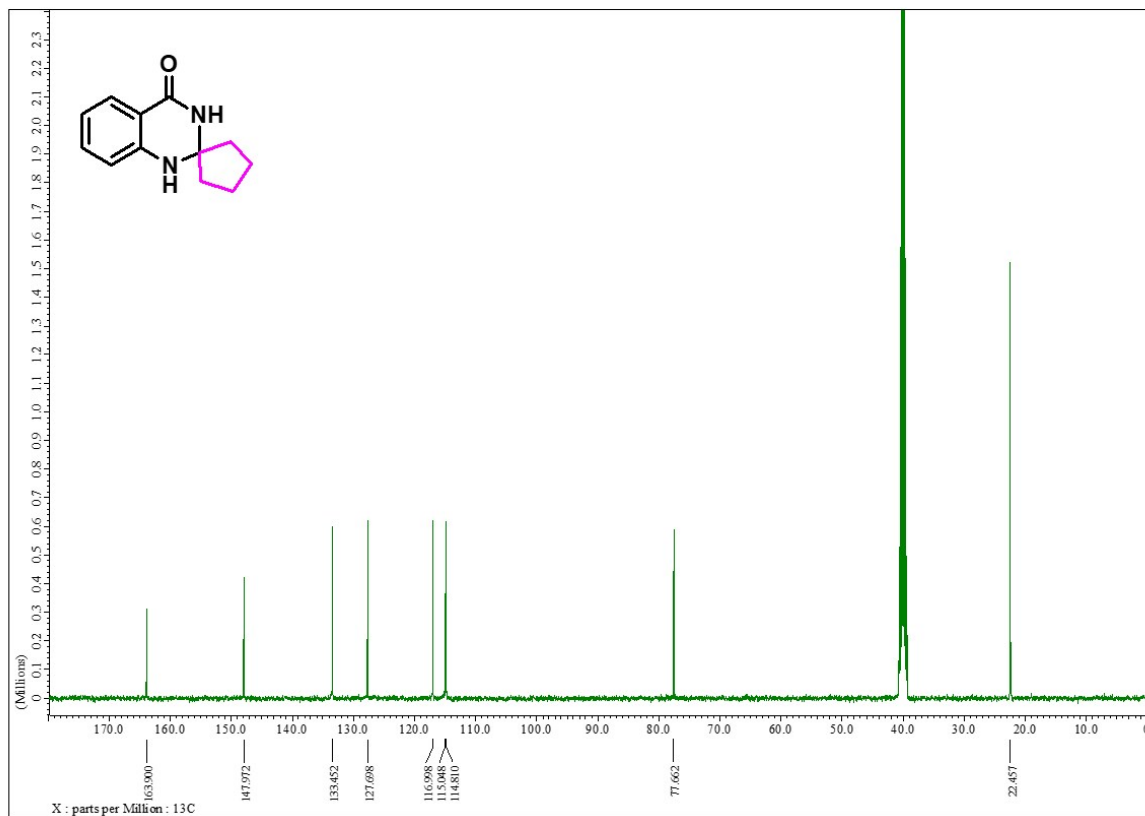

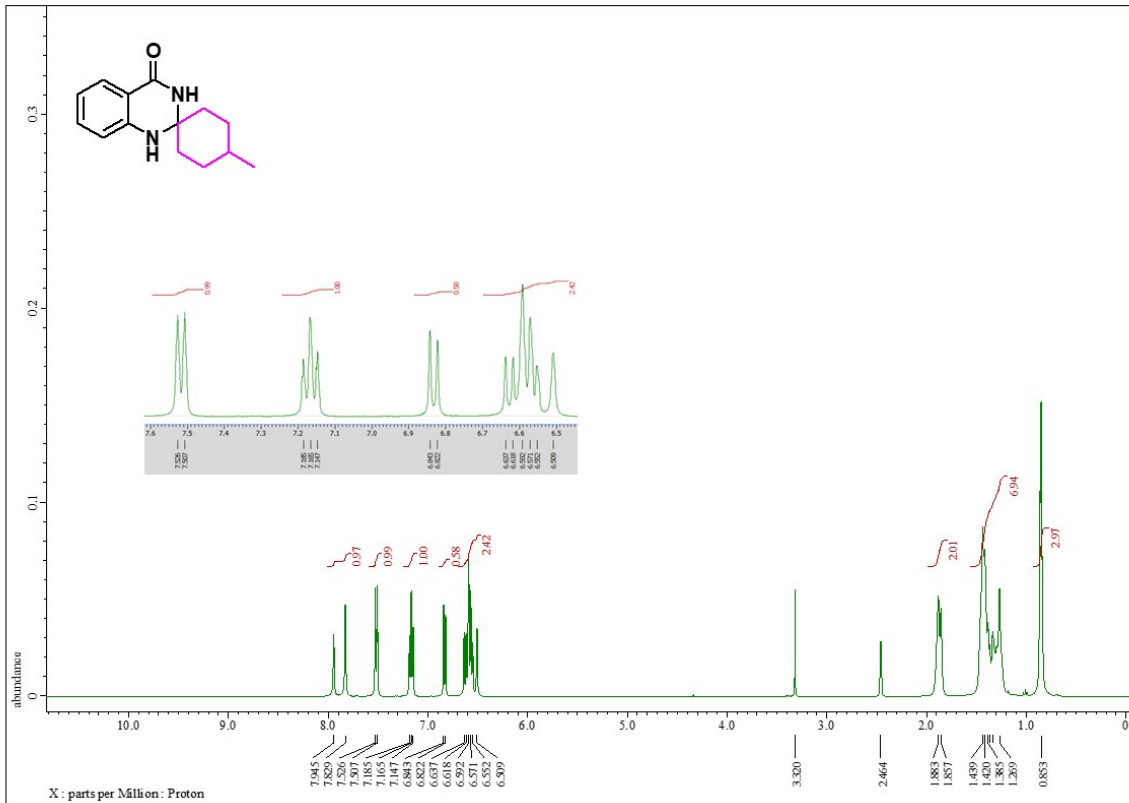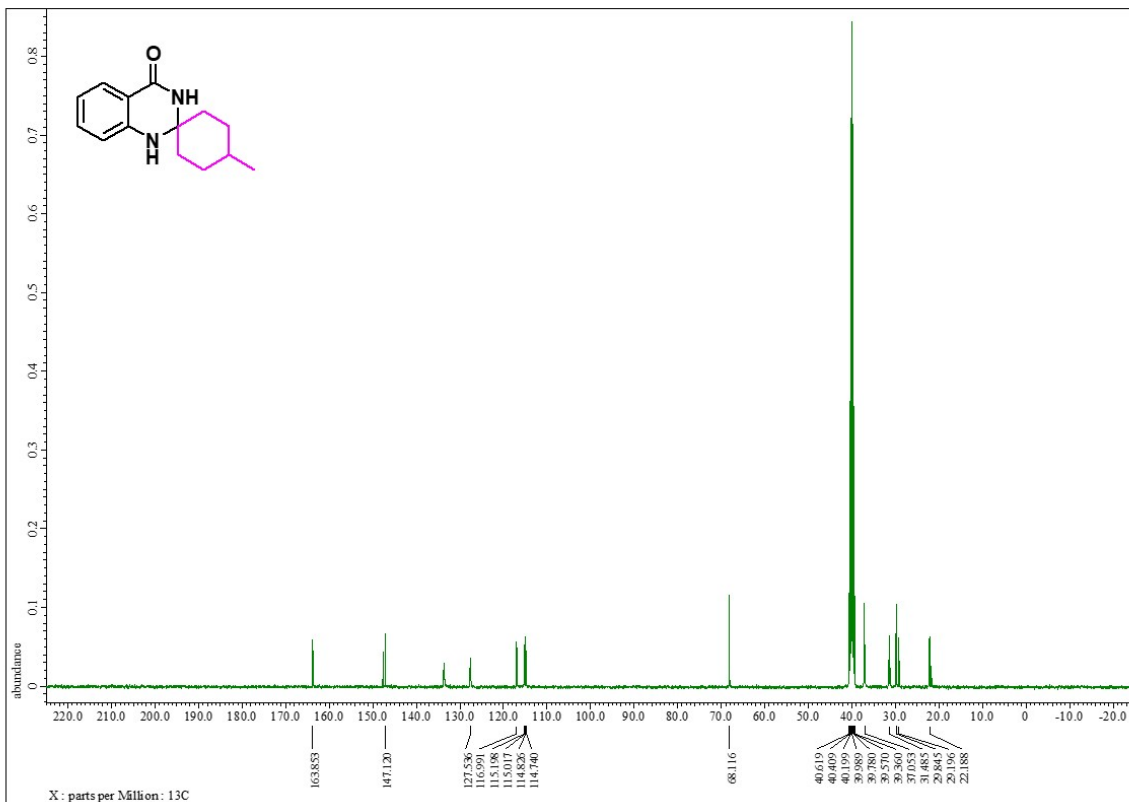

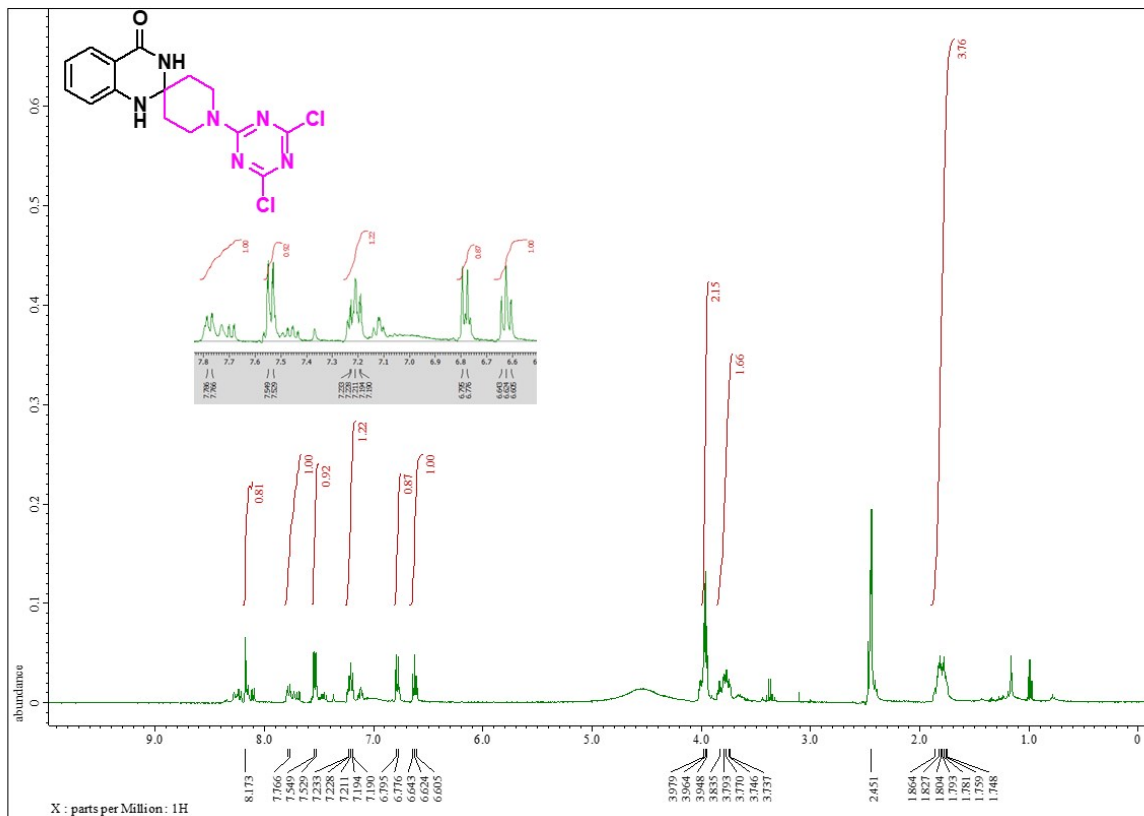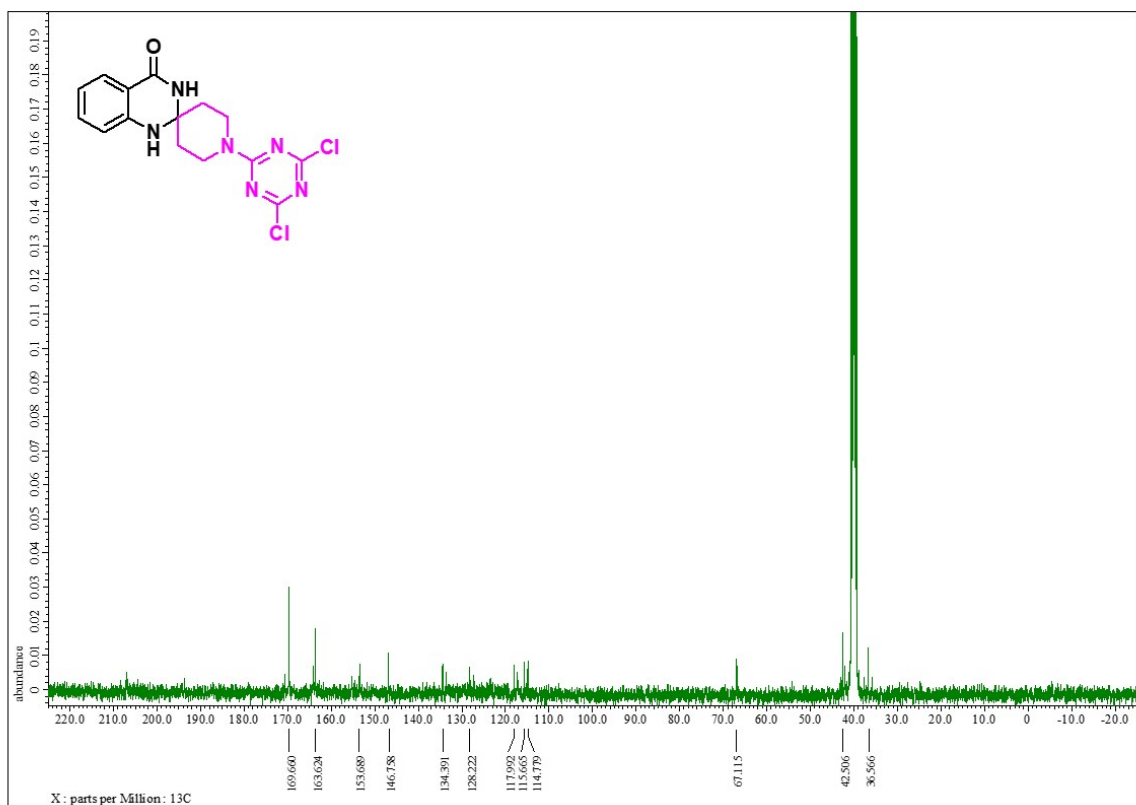

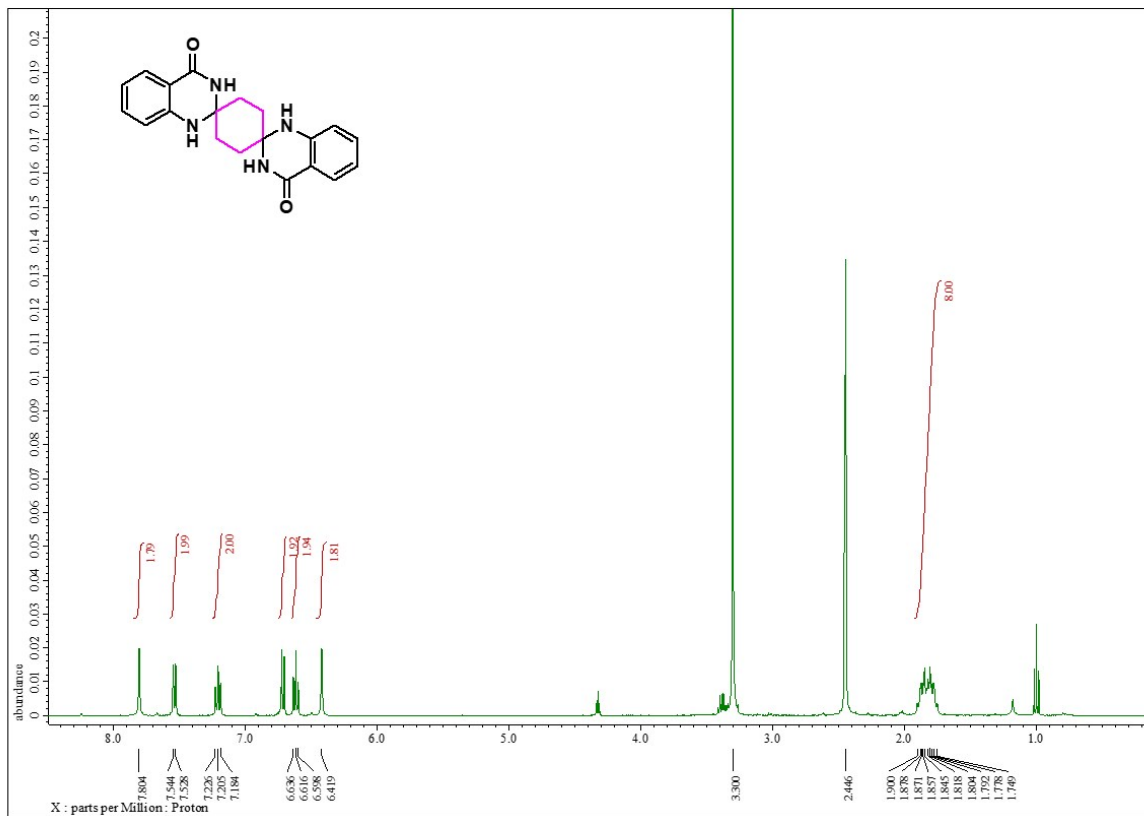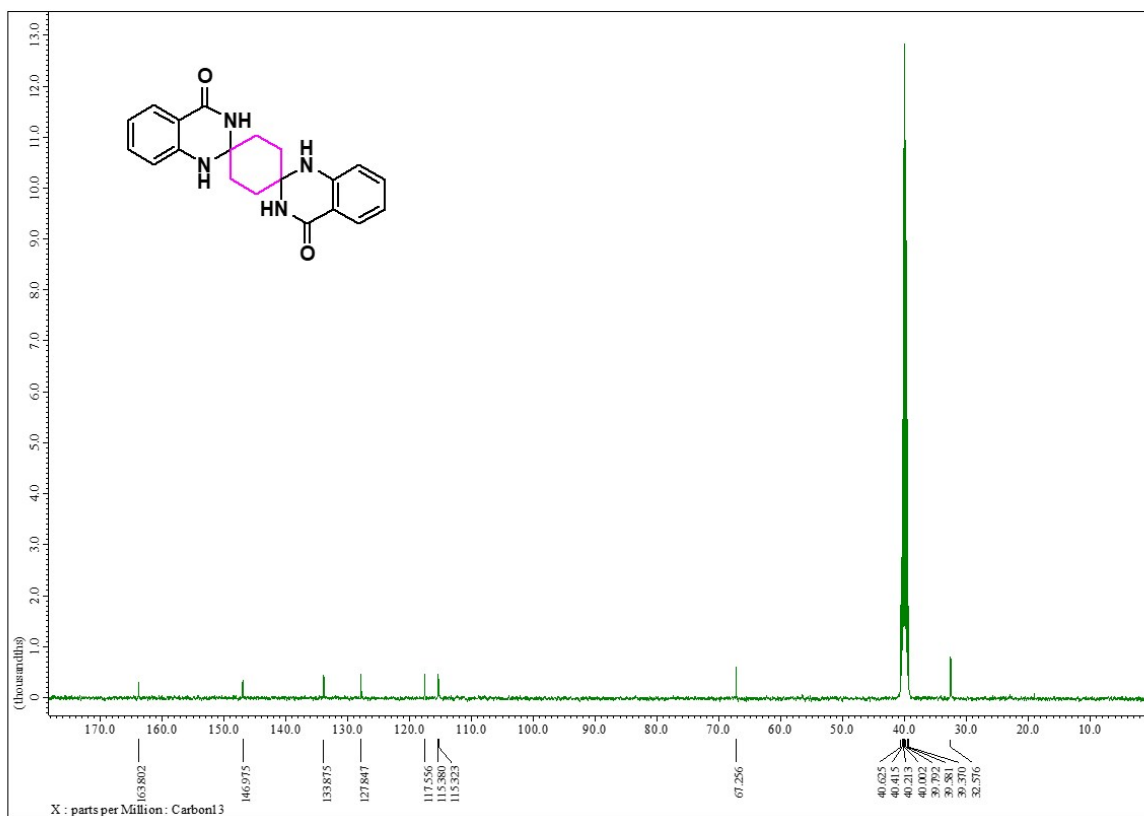

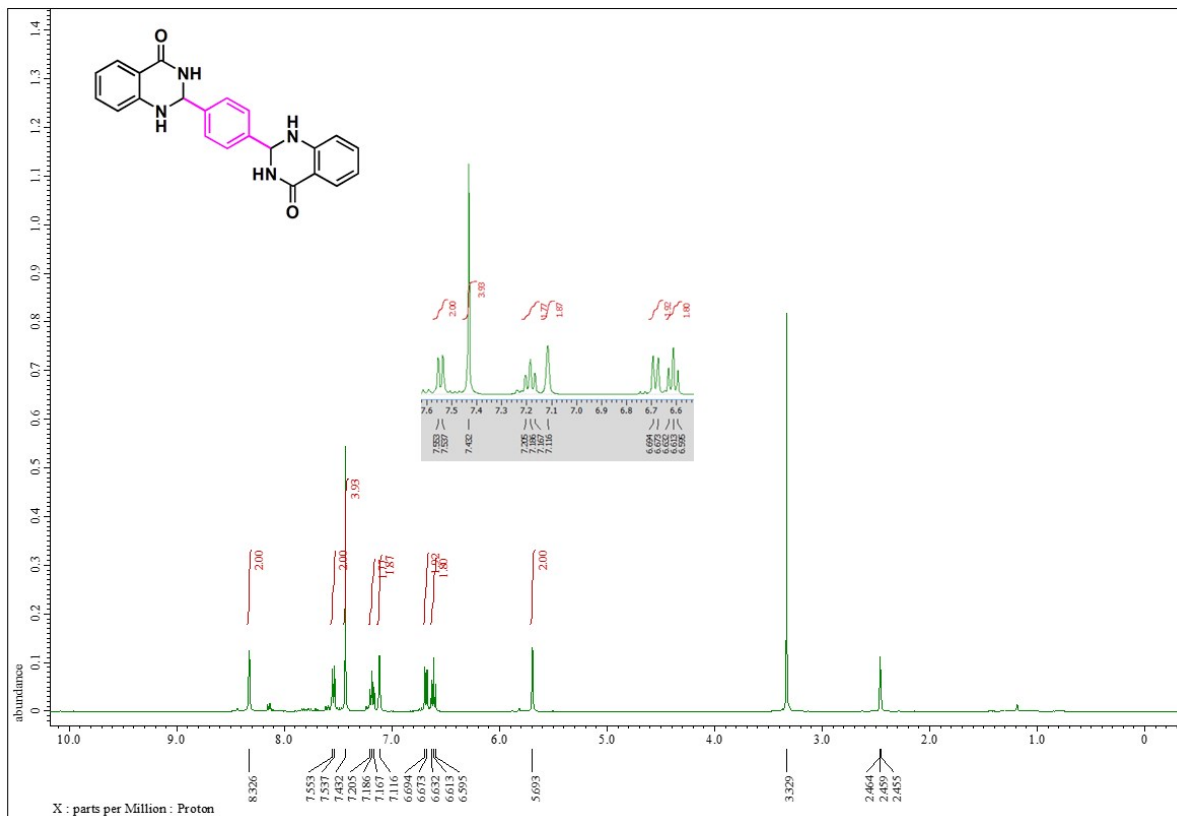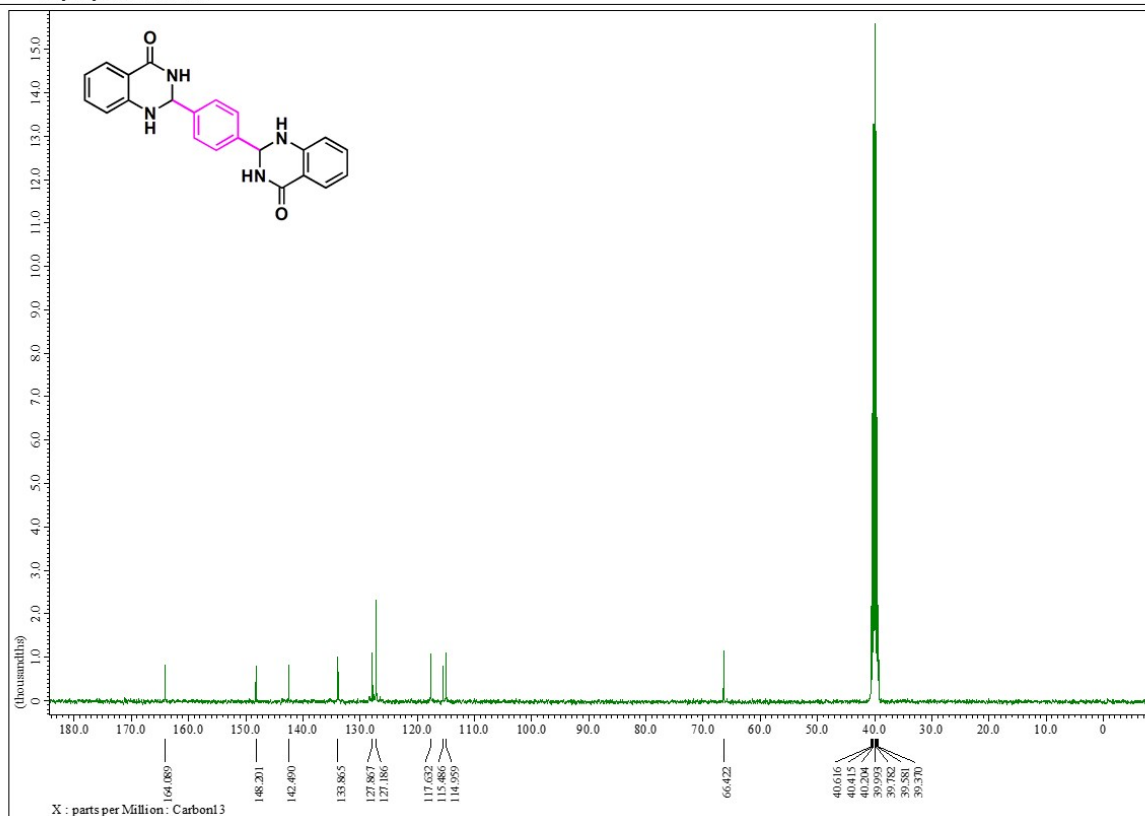



## 5. Mass spectra of some selected compounds

### Qualitative Compound Report

|                               |              |                      |                     |
|-------------------------------|--------------|----------------------|---------------------|
| <b>Data File</b>              | QC-15.d      | <b>Sample Name</b>   | QC-15               |
| <b>Sample Type</b>            | Sample       | <b>Position</b>      | P1-A8               |
| <b>Instrument Name</b>        | Instrument 1 | <b>User Name</b>     |                     |
| <b>Acq Method</b>             | Damo JK.m    | <b>Acquired Time</b> | 05-08-2019 14:03:09 |
| <b>IRM Calibration Status</b> | Success      | <b>DA Method</b>     | Default.m           |
| <b>Comment</b>                |              |                      |                     |

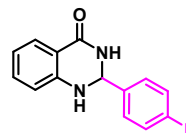

|                       |                             |              |
|-----------------------|-----------------------------|--------------|
| <b>Sample Group</b>   |                             | <b>Info.</b> |
| <b>Acquisition SW</b> | 6200 series TOF/6500 series |              |
| <b>Version</b>        | Q-TOF B.05.01 (B5125.1)     |              |

#### Compound Table

| Compound Label        | RT    | Mass    | Formula       | MFG Formula   | MFG Diff (ppm) | DB Formula    |
|-----------------------|-------|---------|---------------|---------------|----------------|---------------|
| Cpd 18: C14 H9 F N2 O | 0.109 | 240.072 | C14 H9 F N2 O | C14 H9 F N2 O | -8.81          | C14 H9 F N2 O |

| Compound Label        | m/z      | RT    | Algorithm                 | Mass    |
|-----------------------|----------|-------|---------------------------|---------|
| Cpd 18: C14 H9 F N2 O | 241.0793 | 0.109 | Find by Molecular Feature | 240.072 |

#### MFE MS Spectrum

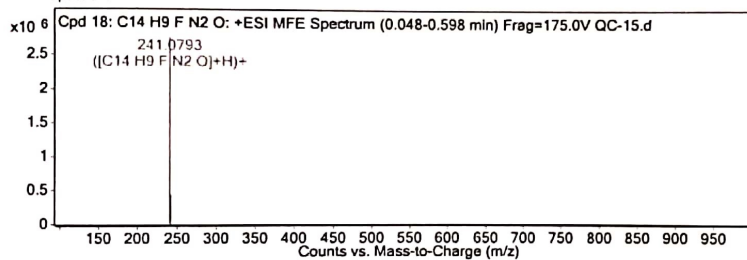

#### MFE MS Zoomed Spectrum

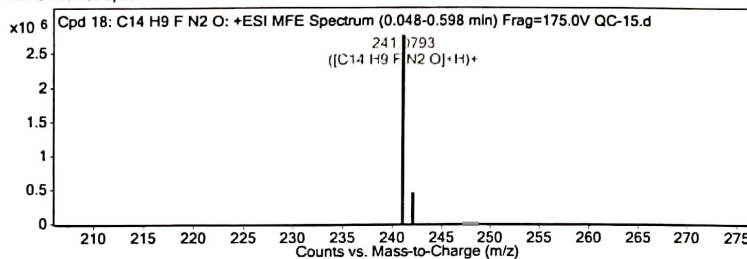

#### MS Spectrum Peak List

| m/z      | z | Abund     | Formula       | Ion    |
|----------|---|-----------|---------------|--------|
| 241.0793 | 1 | 2761729.5 | C14 H9 F N2 O | (M+H)+ |
| 242.0823 | 1 | 438520.15 | C14 H9 F N2 O | (M+H)+ |

--- End Of Report ---

# Qualitative Compound Report

|                        |              |               |                     |
|------------------------|--------------|---------------|---------------------|
| Data File              | QC-8.d       | Sample Name   | QC-8                |
| Sample Type            | Sample       | Position      | P1-B7               |
| Instrument Name        | Instrument 1 | User Name     |                     |
| Acq Method             | Damo JK.m    | Acquired Time | 29-07-2019 12:10:08 |
| IRM Calibration Status | Success      | DA Method     | Default.m           |
| Comment                |              |               |                     |

|                |                             |       |
|----------------|-----------------------------|-------|
| Sample Group   |                             | Info. |
| Acquisition SW | 6200 series TOF/6500 series |       |
| Version        | Q-TOF B.05.01 (B5125.1)     |       |

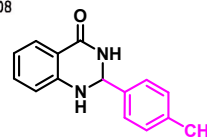

### Compound Table

| Compound Label | RT  | Mass     | Formula     | MFG Formula | DB Formula  |
|----------------|-----|----------|-------------|-------------|-------------|
| Cpd 1: 0.100   | 0.1 | 290.0676 | C13 H6 N8 O | C13 H6 N8 O | C13 H6 N8 O |

| Compound Label | m/z      | RT  | Algorithm                 | Mass     |
|----------------|----------|-----|---------------------------|----------|
| Cpd 1: 0.100   | 291.0747 | 0.1 | Find by Molecular Feature | 290.0676 |

### MFE MS Spectrum

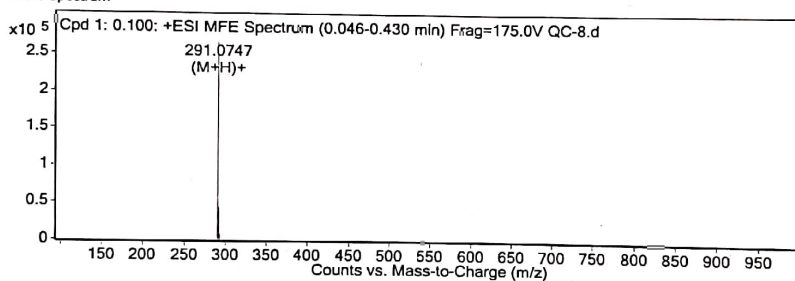

### MFE MS Zoomed Spectrum

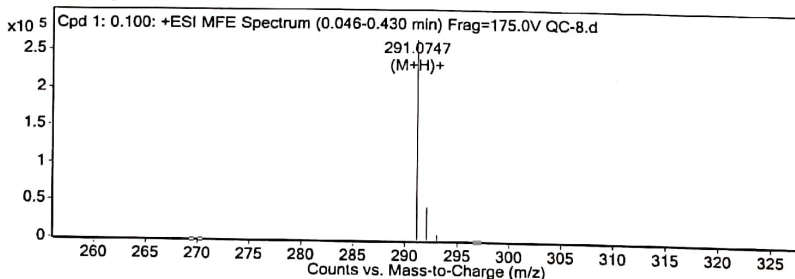

### MS Spectrum Peak List

| m/z      | z | Abund     | Ion    |
|----------|---|-----------|--------|
| 291.0747 | 1 | 264994.72 | (M+H)+ |
| 292.0775 | 1 | 44133.07  | (M+H)+ |
| 293.0835 | 1 | 8402.72   | (M+H)+ |

--- End Of Report ---

# Qualitative Compound Report

|                        |              |               |                     |
|------------------------|--------------|---------------|---------------------|
| Data File              | QC-16.d      | Sample Name   | QC-16               |
| Sample Type            | Sample       | Position      | P1-D6               |
| Instrument Name        | Instrument 1 | User Name     |                     |
| Acq Method             | Damo JK.m    | Acquired Time | 17-07-2019 17:15:22 |
| IRM Calibration Status | Success      | DA Method     | Default.m           |
| Comment                |              |               |                     |

Sample Group Info.  
 Acquisition SW 6200 series TOF/6500 series  
 Version Q-TOF B.05.01 (B5125.1)

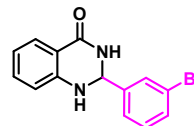

### Compound Table

| Compound Label | RT    | Mass     | MFG Formula |
|----------------|-------|----------|-------------|
| Cpd 6: 0.104   | 0.104 | 302.0021 | <none>      |

| Compound Label | m/z      | RT    | Algorithm                 | Mass     |
|----------------|----------|-------|---------------------------|----------|
| Cpd 6: 0.104   | 303.0094 | 0.104 | Find by Molecular Feature | 302.0021 |

### MFE MS Spectrum

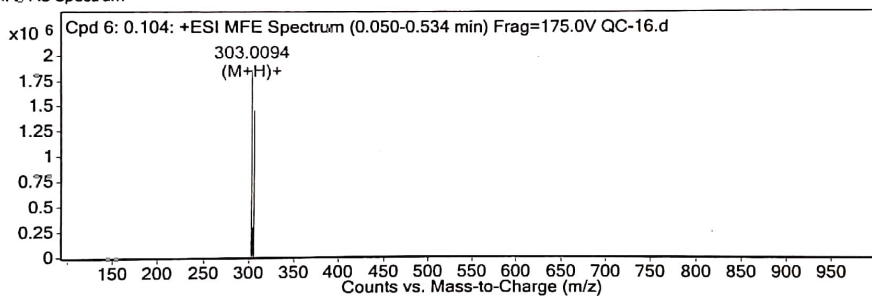

### MFE MS Zoomed Spectrum

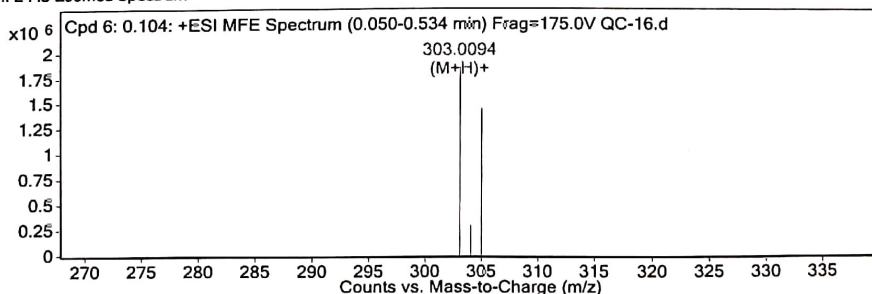

### MS Spectrum Peak List

| m/z      | z | Abund      | Ion    |
|----------|---|------------|--------|
| 303.0094 | 1 | 1858237.38 | (M+H)+ |
| 304.0124 | 1 | 289825.91  | (M+H)+ |
| 305.0109 | 1 | 1453844.52 | (M+H)+ |

--- End Of Report ---

# Qualitative Compound Report

|                               |              |                      |                     |
|-------------------------------|--------------|----------------------|---------------------|
| <b>Data File</b>              | QC-3.d       | <b>Sample Name</b>   | QC-3                |
| <b>Sample Type</b>            | Sample       | <b>Position</b>      | P1-D1               |
| <b>Instrument Name</b>        | Instrument 1 | <b>User Name</b>     |                     |
| <b>Acq Method</b>             | Damo JK.m    | <b>Acquired Time</b> | 14-06-2019 13:28:58 |
| <b>IRM Calibration Status</b> | Success      | <b>DA Method</b>     | Default.m           |
| <b>Comment</b>                |              |                      |                     |

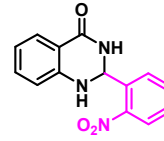

|                       |                             |              |
|-----------------------|-----------------------------|--------------|
| <b>Sample Group</b>   |                             | <b>Info.</b> |
| <b>Acquisition SW</b> | 6200 series TOF/6500 series |              |
| <b>Version</b>        | Q-TOF B.05.01 (B5125.1)     |              |

### Compound Table

| Compound Label      | RT    | Mass     | Formula      | MFG Formula  | MFG Diff (ppm) | DB Formula   |
|---------------------|-------|----------|--------------|--------------|----------------|--------------|
| Cpd 1: C14 H9 N3 O3 | 0.091 | 267.0656 | C14 H9 N3 O3 | C14 H9 N3 O3 | -4.4           | C14 H9 N3 O3 |

| Compound Label      | m/z      | RT    | Algorithm                 | Mass     |
|---------------------|----------|-------|---------------------------|----------|
| Cpd 1: C14 H9 N3 O3 | 268.0729 | 0.091 | Find by Molecular Feature | 267.0656 |

### MFE MS Spectrum

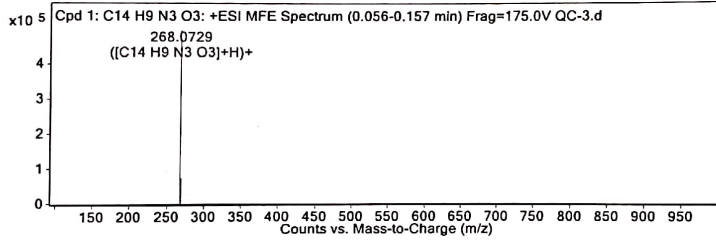

### MFE MS Zoomed Spectrum

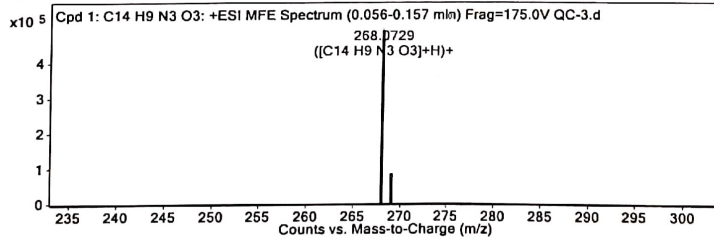

### MS Spectrum Peak List

| m/z      | z | Abund     | Formula      | Ion    |
|----------|---|-----------|--------------|--------|
| 268.0729 | 1 | 497907.19 | C14 H9 N3 O3 | (M+H)+ |
| 269.0757 | 1 | 74185.73  | C14 H9 N3 O3 | (M+H)+ |

— End Of Report —

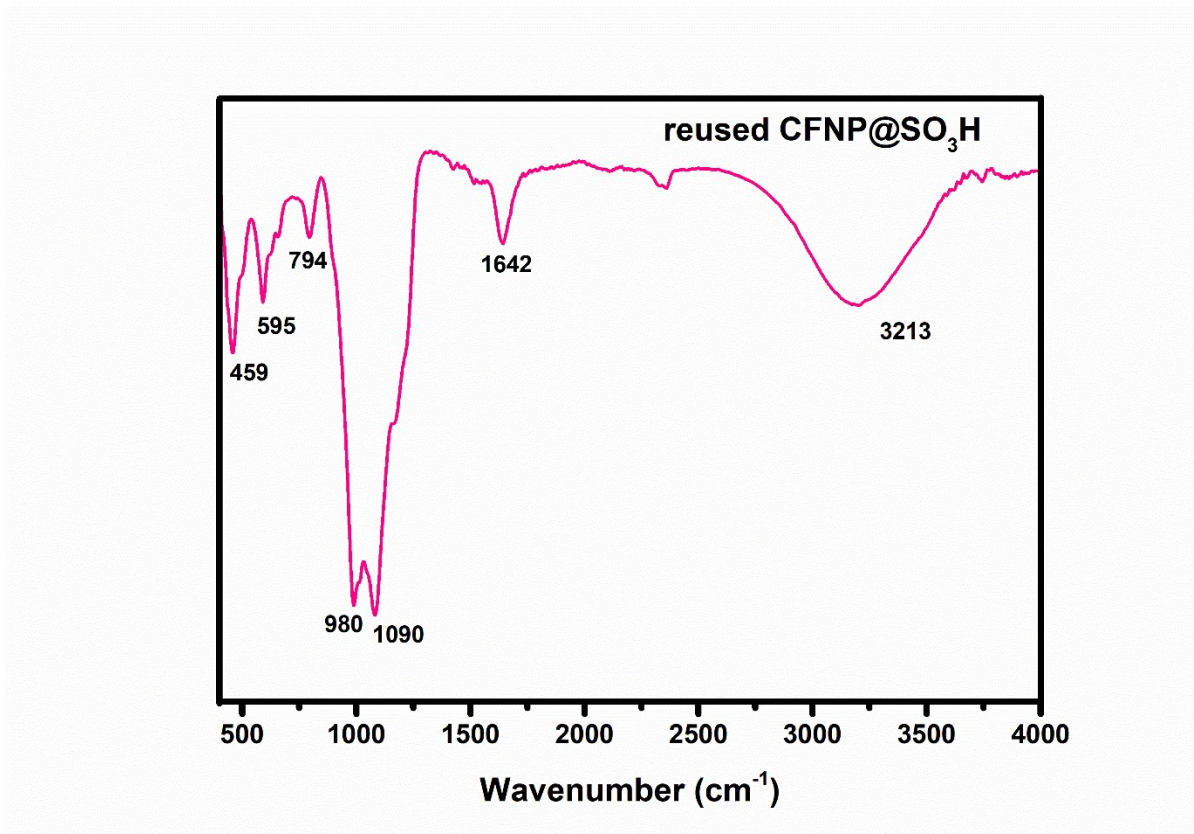

**Figure S1:** FT-IR spectra of reused catalyst (reused CFNP@SO<sub>3</sub>H) after 6 serial runs.

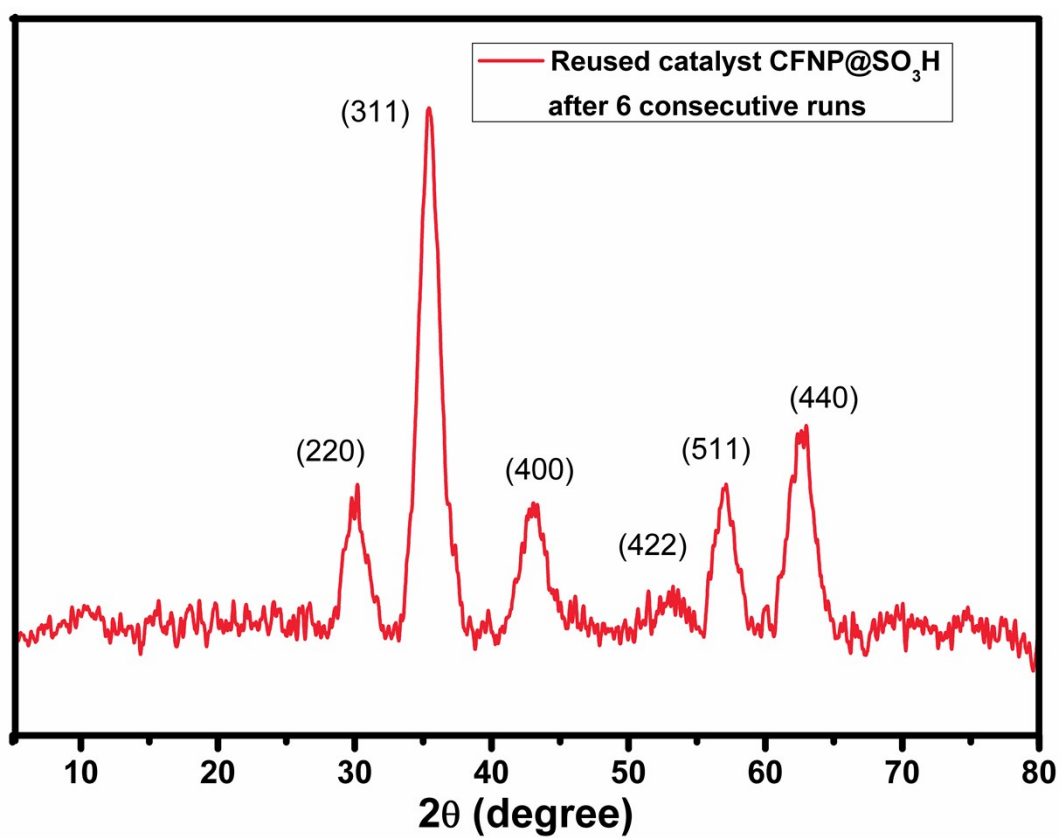

**Figure S2:** Powder XRD analysis of reused catalyst (reused CFNP@SO<sub>3</sub>H) after 6 serial runs.

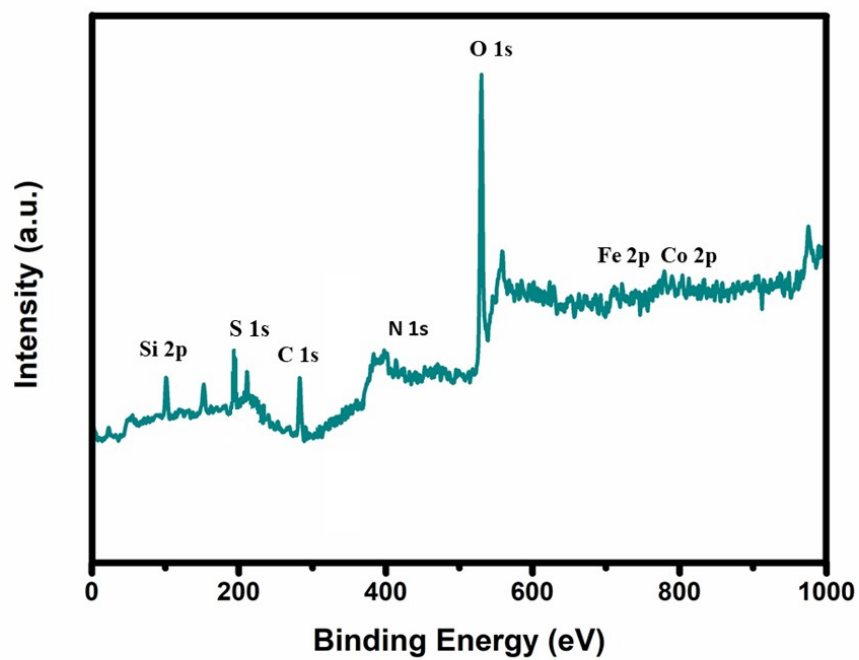

**Figure S3:** XPS survey spectra of catalyst (CFNP@SO<sub>3</sub>H).

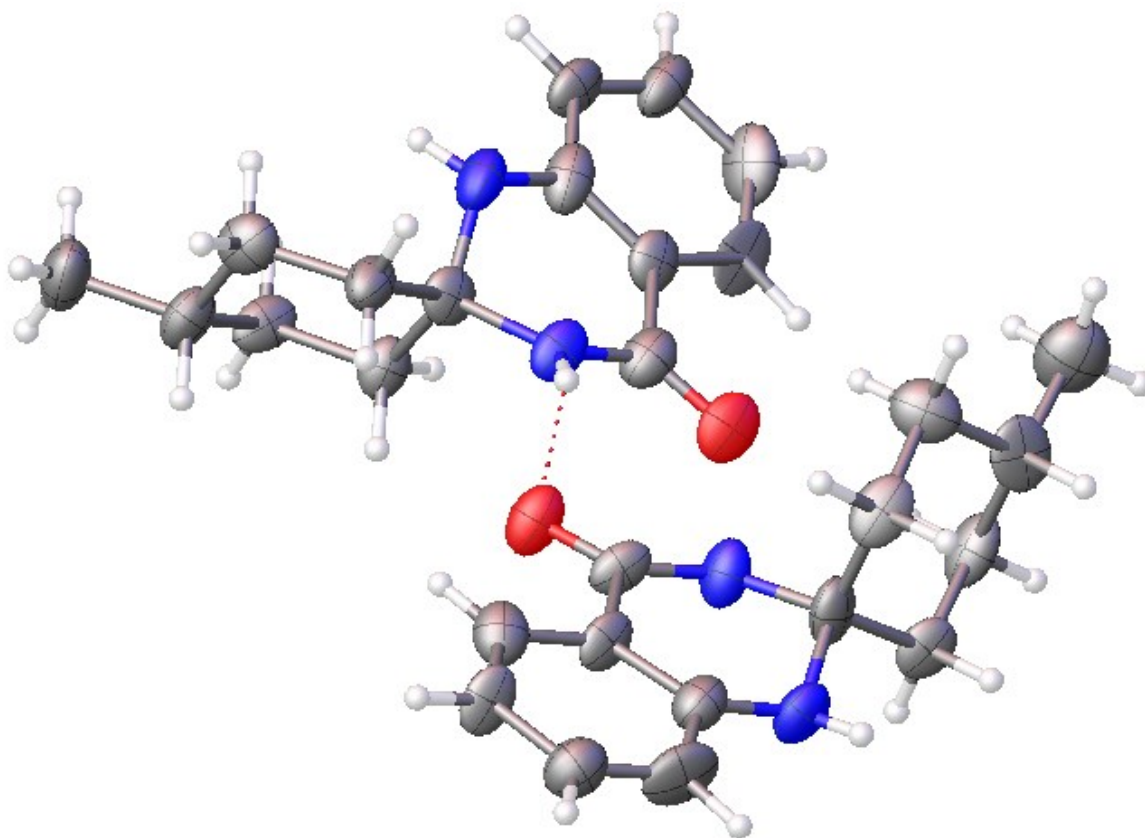

**Figure S4:** Crystal structure of compound 5e showing H-bonding.

### Calculation of the Turn over frequency (TOF) of catalyst

1000 mg (1 g) catalyst (CFNP@SO<sub>3</sub>H) contains 2.48 mmol free sulfonic acid.

To determine the turn over number of the catalyst we had tested the synthesis of quinazolinone (3l) by taking 1 mmol of anthranilamide and 1 mmol of benzaldehyde in presence of 18 mg of catalyst at room temperature.

As the yield of product formation is 98%,

The turn over number (TON) of 3l is =  $\frac{\text{mmol of product}}{\text{mmol of acid site present in catalyst}}$

1 g catalyst holds 2.48 mmol of acid site, so 18 mg of catalyst holds = 0.04464 mmol acid sites.

The turn over number is =  $\frac{0.98}{0.04464} = 21.95$  (as the yield of product is 98%, mmol of product = 0.98)

And turn over frequency (TOF) of 3l is =  $\frac{\text{Turn over number}}{\text{reaction time}} = \frac{21.95}{4/60} \text{ h}^{-1} = 329.25 \text{ h}^{-1}$

**Table S4:** Calculation of TOF (h<sup>-1</sup>) for the synthesized products.

| Product | Yield (%) | TOF (h <sup>-1</sup> ) |
|---------|-----------|------------------------|
| 3a      | 97        | 325.94                 |
| 3b      | 96        | 322.58                 |
| 3c      | 92        | 247.31                 |
| 3d      | 94        | 252.69                 |
| 3e      | 94        | 252.69                 |
| 3f      | 96        | 322.58                 |
| 3g      | 90        | 201.61                 |
| 3h      | 88        | 197.13                 |
| 3i      | 90        | 403.23                 |
| 3j      | 93        | 312.50                 |
| 3k      | 93        | 249.99                 |
| 3l      | 98        | 329.25                 |
| 3m      | 90        | 201.61                 |
| 3n      | 96        | 258.06                 |

|    |    |        |
|----|----|--------|
| 5a | 88 | 197.13 |
| 5b | 97 | 315.86 |
| 5c | 90 | 302.42 |
| 5d | 95 | 255.37 |
| 5e | 97 | 325.94 |
| 5f | 88 | 295.70 |
